# 1 **Community venomics reveals intra-species variations in venom** 2 **composition of a local population of *Vipera kaznakovi* in Northeastern** 3 **Turkey**

4  
5 Daniel Petras<sup>a,b,\*^</sup>, Benjamin-Florian Hempel<sup>a,\*</sup>, Bayram Göçmen<sup>c</sup>, Mert Karis<sup>c</sup>, Gareth Whiteley<sup>d</sup>,  
6 Simon C. Wagstaff<sup>e</sup>, Paul Heiss<sup>a</sup>, Nicholas R. Casewell<sup>d</sup>, Ayse Nalbantsoy<sup>f,^</sup> and Roderich D.  
7 Süssmuth<sup>a,^</sup>

8  
9 <sup>a</sup> Technische Universität Berlin, Institut für Chemie, Strasse des 17. Juni 124, 10623 Berlin, Germany.

10 <sup>b</sup> University of California San Diego, Collaborative Mass Spectrometry Innovation Center, 9500 Gilman Drive, La Jolla,  
11 California 92093, United States.

12 <sup>c</sup> Zoology Section, Department of Biology, Faculty of Science, Ege University, 35100 Bornova, Izmir, Turkey.

13 <sup>d</sup> Centre for Snakebite Research & Interventions, Liverpool School of Tropical Medicine, Pembroke Place, Liverpool, L3  
14 5QA, United Kingdom

15 <sup>e</sup> Bioinformatics Unit, Liverpool School of Tropical Medicine, Pembroke Place, Liverpool, L3 5QA, United Kingdom

16 <sup>f</sup> Department of Bioengineering, Faculty of Engineering, Ege University, Bornova, 35100 Izmir, Turkey.

17 \* These authors contributed equally to this study

18 ^ Correspondence to [dpetras@ucsd.edu](mailto:dpetras@ucsd.edu), [analbantsoy@gmail.com](mailto:analbantsoy@gmail.com) or [roderich.suessmuth@tu-berlin.de](mailto:roderich.suessmuth@tu-berlin.de)

## 19 20 21 **Abstract**

22 **We report on the variable venom composition of a population of the Caucasus viper (*Vipera***  
23 ***kaznakovi*) in Northeastern Turkey. We applied a combination of venom gland transcriptomics,**  
24 **as well as de-complexing bottom-up and top-down venomics, enabling the comparison of the**  
25 **venom proteomes from multiple individuals. In total, we identified peptides and proteins from**  
26 **15 toxin families, including snake venom metalloproteinases (svMP; 37.8%), phospholipases A<sub>2</sub>**  
27 **(PLA<sub>2</sub>; 19.0%), snake venom serine proteinases (svSP; 11.5%), C-type lectins (CTL; 6.9%) and**  
28 **cysteine-rich secretory proteins (CRISP; 5.0%), in addition to several low abundant toxin**  
29 **families. Furthermore, we identified intra-species variations of the *V. kaznakovi* venom**  
30 **composition, and find these were mainly driven by the age of the animals, with lower svSP**  
31 **abundance in juveniles. On a proteoform level, several small molecular weight toxins between 5**  
32 **and 8 kDa in size, as well as PLA<sub>2</sub>s, drove the difference between juvenile and adult individuals.**  
33 **This study provides first insights into venom variability of *V. kaznakovi* and highlights the utility**  
34 **of intact mass profiling for a fast and detailed comparison of snake venoms of individuals from**  
35 **a community.**

## 36 37 38 **Biological Significance**

39 Population level and ontogenetic venom variation (e.g. diet, habitat, sex or age) can cause a loss of  
40 antivenom efficacy against snake bites from wide ranging snake populations. The state of the art for  
41 the analysis of snake venoms are de-complexing bottom-up proteomics approaches. While useful,  
42 these have the significant drawback of being time-consuming and following costly protocols, and  
43 consequently are often applied to pooled venom samples. To overcome these shortcomings and to  
44 enable rapid and detailed profiling of large numbers of individual venom samples, we integrated an  
45 intact protein analysis workflow into a transcriptomics-guided bottom-up approach. The application  
46 of this workflow to snake individuals of a local population of *V. kaznakovi* revealed intra-species  
47 variations in venom composition, which are primarily explained by the age of the animals, and  
48 highlighted svSP abundance to be one of the molecular drivers for the compositional differences.

49

## 50 **Highlights**

- 51 • First community venom analysis of a local population of the Caucasian viper (*Vipera*  
52 *kaznakovi*).
- 53 • The venom gland transcriptome of *V. kaznakovi* identified 46 toxin genes relating to 15 venom  
54 toxin families.
- 55 • Bottom-up venomics revealed the identification of 25 proteins covering 7 toxin families mainly  
56 dominated by snake venom metalloproteinases (svMP).
- 57 • Community venomics by top-down mass profiling revealed ontogenetic shifts between juvenile  
58 and adult snakes.

59

60 **Keywords:** Viperidae, Snake, Middle East, Toxin, Caucasian viper, *Vipera kaznakovi*, Snake  
61 Venomics, Transcriptomics, Top-down Venomics, Community Venomics, Venom

62

63

## 64 **1. Introduction**

65 Venomics is considered an integrative approach, combining proteomics, transcriptomics and  
66 genomics to study venoms [1]. Although the term was initially used to describe the mass  
67 spectrometry-based proteomic characterization of venoms [2,3], genomic [4,5] or more commonly  
68 venom gland transcriptomic sequencing [6–14] have also been used to characterize venom  
69 compositions. These molecular approaches render an overview over venom composition by providing  
70 the nucleotide sequences of venom toxin-encoding genes (among others) and, in the case of  
71 transcriptomics, provide an estimation of their relative expression in the venom gland. Furthermore,  
72 (translated) protein sequence databases are crucial for the robust annotation of tandem mass spectra  
73 from proteomic analyses in peptide/protein spectrum matching (PrSM). A bibliographic search to the  
74 keyword “Snake venomics” in PubMed identified 147 hits between 2004 and 2018, which showed  
75 particularly in recent years a rapid expansion in the application of venomics approaches.

76 Initial proteomic analyses of snake venoms included the combination of multidimensional separation  
77 techniques (chromatographic and gel electrophoresis), N-terminal Edman degradation, and *de novo*  
78 sequencing by tandem mass spectrometry of tryptic peptides gathered by in-gel digestion of SDS-  
79 PAGE bands [2,15]. Since these initial studies, the proteomic characterization of snake venoms has  
80 become much more comprehensive due to technical advances in mass spectrometry and next  
81 generation nucleotide sequencing. Several complementary strategies were developed to unveil the

82 venom proteomes of more than 100 snake species [16]. Most of these studies applied the so called  
83 ‘bottom-up’ proteomics whereby intact proteins are typically digested with trypsin before tandem  
84 mass spectrometry analysis. Many workflows perform venom decomplexation prior to the digestion  
85 either by liquid chromatography (LC) or gel electrophoresis, or a combination of both [17]. The  
86 direct, in-solution digestion, or so called ‘shotgun proteomics’, allows for a fast qualitative overview,  
87 but suffers from a less quantitative breakdown of snake venom composition [17,18]. For example, in  
88 shotgun experiments, the problem of protein inference often does not permit the differentiation of the  
89 numerous toxin isoforms present in venom [19]. Thus, the chromatographic or electrophoretic  
90 separation of venom samples greatly aids in differentiating between toxin isoforms (paralogs). In  
91 addition, decomplexing prior to trypsin digestion often does not allow for a clear identification of  
92 differential post-translational modified variants, so-called proteoforms [20].

93 A logical bypass of this problematic would be the omittance of the digestion step and the direct  
94 analysis of intact proteins by tandem mass spectrometry, called top-down proteomics. Recently top-  
95 down protein analysis has been applied alone or in combination with other venomics approaches to  
96 study the venom of King Cobra (*Ophiophagus hannah*) [21,22] the entire genus of mambas  
97 (*Dendroaspis* spp.) [23,24], the brown tree snake (*Boiga irregularis*) [6], the Okinawa Habu Pit Viper  
98 (*Protobothrops flavoviridis*) [25] and several viper species from Turkey [26–28]. In the case of  
99 viperid species, top-down analysis typically only reveals a partial characterization of the venom, as a  
100 number of the main toxin components, such as high molecular weight snake venom  
101 metalloproteinases (svMPs) (>30 kDa), are challenging to efficiently ionize by denaturing  
102 electrospray ionization (ESI) and might only provide few observable fragments in tandem MS [29]. A  
103 possible way to overcome difficulties in terms of ionization of high molecular weight proteins is the  
104 application of native ESI, as described by Melani *et al.* [22]. However native top-down mass  
105 spectrometry typically requires a special type of mass spectrometer with extended mass range and  
106 more extensive sample preparation, which makes this type of analysis more technically challenging.  
107 In most of the aforementioned studies, the top-down workflow was performed with a front-end LC-  
108 based sample decomplexation. This allows for the generation of MS1 mass profiles (XICs) of intact  
109 proteoforms. Typically, the MS1 information is accompanied by tandem MS (MS2) information

110 acquired in data-dependent acquisition (DDA) mode. The MS2 fragment spectra are then matched to a  
111 translated transcriptome/genome database in order to identify the proteins. In the case that there are  
112 not enough MS2 fragment peaks of a particular proteoform, the intact molecular mass can still enable  
113 identification, especially if the intact mass can be associated to masses observed in complementary  
114 experiments, such as retention time, mass range of SDS-PAGE and/or bottom-up protein IDs of  
115 decomplexed bottom-up venomics [26]. The additional information gained through exact intact  
116 protein masses can be particularly informative to differentiate between isoforms or proteoforms.  
117 Furthermore, the simple sample preparation, high sensitivity and fast analysis time allows for a rapid  
118 comparison of the venom composition. The quantitative capabilities of top-down approaches [30–32]  
119 thereby offer great potential for comparative venom studies of individuals. While most snake venom  
120 compositions reported so far [16] were performed on a single pool of venom sourced from different  
121 numbers of individuals, several studies have shown correlations between different ecological,  
122 geographical, genetic and/or developmental factors and the venom proteome, e.g. different diets [33–  
123 36], regional separation of populations [37–39], sex [40–42] or age [43–46]. In addition to better  
124 understand the heritability of venom toxins [47], and the evolutionary processes underpinning  
125 population level venom variations [48], venomics is an important approach to better understand  
126 regional and intraspecific variations in the venom composition of medically important snake species,  
127 which has considerable relevance for the development and clinical utility of snakebite therapies,  
128 known as antivenom [49,50].

129 Here, we applied a top-down venomics approach to demonstrate intraspecific venom variation in a  
130 local population of the medical relevant Caucasian viper (*Vipera kaznakovi*). The Caucasian viper is a  
131 subtropical, medium-sized, viper species with a distribution range mainly at the Caucasian Black Sea  
132 coast in the Artvin and Rize province of Turkey. *V. kaznakovi* feed predominately on small  
133 vertebrates (mice, lizards etc.) and also insects [51]. In a previous shotgun proteomics study of this  
134 species, Utkin and coworkers described the venom of *V. kaznakovi* to be composed of phospholipase  
135 A<sub>2</sub> (PLA<sub>2</sub>), svMP, snake venom serine proteases (svSP), Cysteine-rich secretory proteins (CRISP), C-  
136 type lectins (CTL), L-amino acid oxidase (LAAO), vascular endothelial growth factor (VEGF),  
137 disintegrins (Dis), phospholipase B (PLB), nerve growth factors (NGF), as well as other a number of

138 other proteins of lower abundance [52]. In this study, we pursue a more in-depth approach to  
139 characterizing the venom of this species. We use a combination of venom gland transcriptomics,  
140 decomplexing bottom-up proteomics and comparative top-down proteomics to broadly characterize  
141 the venom composition of this species, and to also investigate intraspecific variation in toxins on the  
142 level of the individual snakes.

143

## 144 **2. Material & Methods**

### 145 2.1. Sampling

146 Venom samples of *V. kaznakovi* were collected from 6 adult (2 female, 4 male) and 3 juvenile  
147 specimens (unknown sex). All specimens were captured in late June 2015 in their natural habitat and  
148 released back into their natural environment after venom extraction. The *V. kaznakovi* individuals  
149 were collected in Artvin province in Turkey near the Georgian border, with 6 individuals sampled  
150 from Hopa district, 2 individuals from Borçka district and 1 specimen in the Arhavi district. An  
151 additional female individual found in Borçka district was collected for venom gland dissection for  
152 transcriptomics analysis. Ethical permission (Ege University Animal Experiments Ethics Committee,  
153 2013#049) and special permission (2015#124662) for the sampling of wild-caught *V. kaznakovi* were  
154 received from the Republic of Turkey, Ministry of Forestry and Water Affairs.

155

### 156 2.2. Sample storage and preparation

157 Crude *V. kaznakovi* venom was extracted by using a parafilm-covered laboratory beaker without  
158 exerting pressure on the venom glands. Venom samples were centrifuged at  $2000 \times g$  for 10 min at  
159  $4^\circ\text{C}$  to remove cell debris. Supernatants were immediately frozen at  $-80^\circ\text{C}$ , lyophilized and samples  
160 were stored at  $4^\circ\text{C}$  until use.

161

### 162 2.3. Determination of lethal dose ( $LD_{50}$ )

163 Lethal potency ( $LD_{50}$ ) of venoms to mice (milligrams of dry weight per kg) was determined by an up-  
164 and down method as recommended by the Organization for Economic Cooperation and Development  
165 (OECD) guidelines (Test No. 425) [53,54]. Groups of five mice ( $n = 15$ ; age, 8 to 10 weeks; female 8

166 and male 7 individuals) were used per venom dose. Various venom concentrations (5, 2 and 1 mg/kg,  
167 milligrams of protein per kg calculated from dry weight venom by Bradford assay) were diluted in  
168 ultrapure water to a final volume of 100  $\mu$ L and injected by intraperitoneal (IP) routes. Control mice  
169 (n = 5; female 2 and male 3 individuals) received a single IP injection of sterile saline (0.9%, 0.1 mL).  
170 All assays and procedures involving animals strictly followed the ethical principles in animal research  
171 adopted by the Swiss Academy of Medical Sciences [55]. Additionally, they were approved by a local  
172 ethics committee (2013#049). The mortality was recorded 24 h after injection. The median lethal dose  
173 was determined by a nonlinear regression fitting procedure (GraphPad Prism 5., Version 5.01, Inc.,  
174 San Diego, CA, USA).

175

#### 176 2.4. RNA isolation and purification

177 Venom glands were dissected from a wild caught adult female specimen of *V. kaznakovi* in Kanlıdere,  
178 Hopa district (Artvin province) and processed as previously described [9,24]. Briefly, immediately  
179 following euthanasia, venom glands were dissected and were immediately flash frozen in liquid  
180 nitrogen and stored cryogenically prior to RNA extraction. Venom glands were next homogenized  
181 under liquid nitrogen and total RNA extracted using a TRIzol Plus RNA purification kit (Invitrogen),  
182 DNase treated with the PureLink DNase set (Invitrogen) and poly(A) selected using the Dynabeads  
183 mRNA DIRECT purification kit (Life Technologies), as previously detailed [9,24].

184

#### 185 2.5. RNA sequencing, assembly and annotation

186 RNA-Seq was performed as previously described [9,24]. The RNA-Seq library was prepared from  
187 50 ng of enriched RNA material using the ScriptSeq v2 RNA-Seq Library Preparation Kit (epicenter,  
188 Madison, WI, USA), following 12 cycles of amplification. The resulting sequencing library was  
189 purified using AMPure XP beads (Agencourt, Brea, CA, USA), quantified using the Qubit dsDNA  
190 HS Assay Kit (Life Technologies), before the size distribution was assessed using a Bioanalyser  
191 (Agilent). The library was then multiplexed and sequenced (alongside other sequencing libraries not  
192 reported in this study) on a single lane of an Illumina MiSeq, housed at the Centre for Genomic  
193 Research, Liverpool, UK. The *V. kaznakovi* library amounted to 1/6<sup>th</sup> of the total sequencing lane. The

194 ensuing read data was quality processed by (i) removing the presence of any adapter sequences using  
195 Cutadapt (<https://code.google.com/p/cutadapt/>) and (ii) trimming low quality bases using Sickle  
196 (<https://github.com/najoshi/sickle>). Reads were trimmed if bases at the 3' end matched the adapter  
197 sequence for 3 bp or more, and further trimmed with a minimum window quality score of 20. After  
198 trimming, reads shorter than 10 bp were removed.

199 For sequence assembly we used VTBuilder, a *de novo* transcriptome assembly program previously  
200 designed and validated for constructing snake venom gland transcriptomes [56]. Paired-end read data  
201 was entered into VTBuilder and executed with the following parameters: min. input read length  
202 150 bp; min. output transcript length 300 bp; min. isoform similarity 96%. Assembled contigs were  
203 annotated with the BLAST2GO Pro v3 [57] using the blastx-fast algorithm with a significance  
204 threshold of  $1e^{-5}$ , to provide BLAST annotations (max 20 hits) against NCBI's non redundant (NR)  
205 protein database (41 volumes; Nov 2015) followed by mapping to gene ontology terms, and Interpro  
206 domain annotation using default parameters. Following generic annotation, venom toxins were  
207 initially identified based on their BLAST similarity to sequences previously identified in the literature  
208 or in molecular databases as snake venom toxins, and then manually curated for validation.

209

## 210 2.6. Venom proteomics (bottom-up)

211 The crude venom (1 mg) was dissolved to a final concentration of 10 mg/ml in aqueous 3% (v/v)  
212 acetonitrile (ACN) with 1% (v/v) formic acid (FA) and centrifuged at 16,000 g for 5 min to spin down  
213 insoluble content. The supernatant was loaded onto a semi-preparative reversed-phase HPLC with a  
214 Supelco Discovery BIO wide Pore C18-3 column (4.6 x 150 mm, 3  $\mu$ m particle size) using an Agilent  
215 1260 Low Pressure Gradient System (Agilent, Waldbronn, Germany). The column was operated with  
216 a flow rate of 1 mL/min and performed with ultrapure water (solution A) and ACN (solution B), both  
217 including 0.1% (v/v) FA. A standard separation gradient was used with solution A and solution B,  
218 starting isocratically (5% B) for 5 min, followed by linear gradients of 5-40% B for 95 min and 40-  
219 70% for 20 min, then 70% B for 10 min, and finally re-equilibration at 5% B for 10 min. Peak  
220 detection was performed at  $\lambda = 214$  nm using a diode array detector (DAD). After the  
221 chromatographic separation of the crude venom, the collected and vacuum-dried peak fractions were

222 submitted to a SDS-PAGE gel (12% polyacrylamide). Subsequently, the coomassie-stained bands  
223 were excised, and submitted to in-gel trypsin digestion, reduced with fresh dithiothreitol (100 mM  
224 DTT in 100 mM ammonium hydrogencarbonate, pH 8.3, for 30 min at 56 °C) and alkylated with  
225 iodoacetamide (55 mM IAC in 100 mM ammonium hydrogencarbonate, pH 8.3, for 30 min at 25 °C  
226 in the dark). The resulting peptides were then extracted with 100 µL aqueous 30% (v/v) ACN just as  
227 5% (v/v) FA for 15 min at 37 °C. The supernatant was vacuum-dried (Thermo speedvac, Bremen,  
228 Germany), redissolved in 20 µL aqueous 3% (v/v) ACN with 1% (v/v) FA and submitted to LC-  
229 MS/MS analysis.

230 The bottom-up analysis were performed with an Orbitrap XL mass spectrometer (Thermo, Bremen,  
231 Germany) via an Agilent 1260 HPLC system (Agilent Technologies, Waldbronn, Germany) using a  
232 reversed-phase Grace Vydac 218MSC18 (2.1 x 150 mm, 5 µm particle size) column. The pre-  
233 chromatographic separation was performed with the following settings: After an isocratic  
234 equilibration (5% B) for 1 min, the peptides were eluted with a linear gradient of 5-40% B for 10 min,  
235 40-99% B in 3 min, held at 99% B for 3 min and re-equilibrated in 5% B for 3 min.

236

## 237 2.7. Community venom profiling (top-down)

238 The top-down MS analysis was performed by dissolving the crude venoms in ultrapure water  
239 containing formic acid (FA, 1%) to a final concentration of 10 mg/mL, and centrifuged at 20,000 x g  
240 for 5 min. Aliquots of 10 µL dissolved venom samples were submitted to reverse-phase (RP) HPLC-  
241 high-resolution (HR)-MS analyses. RP-HPLC-HR-MS experiments were performed on an Agilent  
242 1260 HPLC system (Agilent, Waldbronn, Germany) coupled to an Orbitrap LTQ XL mass  
243 spectrometer (Thermo, Bremen, Germany). RP-HPLC separation was performed on a Supelco  
244 Discovery Biowide C18 column (300 Å pore size, 2 × 150 mm column size, 3 µm particle size). The  
245 flow rate was set to 0.3 mL/min and the column was eluted with a gradient of 0.1% FA in water  
246 (solution A) and 0.1% FA in ACN (solution B): 5% B for 5 min, followed by 5–40% B for 95 min,  
247 and 40–70% for 20 min. Finally, the gradient was held isocratic with 70% B for 10 min and re-  
248 equilibrated at 5% B for 10 min. ESI settings were: 11 L/min sheath gas; 35 L/min auxiliary gas;  
249 spray voltage, 4.8 kV; capillary voltage, 63 V; tube lens voltage, 135 V; and capillary temperature,



250 330 °C. MS/MS spectra were obtained in data-dependent acquisition (DDA) mode. FTMS  
251 measurements were performed with 1  $\mu$  scans and 1000 ms maximal fill time. AGC targets were set to  
252  $10^6$  for full scans and to  $3 \times 10^5$  for MS/MS scans, and the survey scan as well as both data dependent  
253 MS/MS scans were performed with a mass resolution (R) of 100,000 (at  $m/z$  400). For MS/MS the  
254 two most abundant ions of the survey scan with known charge were selected. Normalized CID energy  
255 was set to 30% for the first, and 35% for the second, MS/MS event of each duty cycle. The default  
256 charge state was set to  $z = 6$ , and the activation time to 30 ms. Additional HCD experiments were  
257 performed with 35% normalized collision energy, 30 ms activation time and  $z = 5$  default charge  
258 state. The mass window for precursor ion selection was set to 2 or 6  $m/z$ . A window of 3  $m/z$  was set  
259 for dynamic exclusion of up to 50 precursor ions with a repeat of 1 within 10 s for the next 20 s.

260

## 261 2.8. Bioinformatic analysis

262 The LC-MS/MS data files (.raw) obtained from the in-gel digestion were converted to mascot generic  
263 format (.mgf) files via MSConvert GUI of the ProteoWizard package  
264 (<http://proteowizard.sourceforge.net>; version 3.0.10328) and annotated by DeNovo GUI [58]  
265 (version 1.14.5) with a mass accuracy of 10 ppm for precursor mass and 0.2  $m/z$  for fragment peaks.  
266 A fixed modification carbamidomethyl cysteine (C +57.02 Da) was selected. Resulting sequence tags  
267 were examined manually and searched against the non-redundant Viperidae protein database (taxid:  
268 8689) using the basic local alignment search tool (BLAST) [59].

269 For peptide spectrum matching, the SearchGUI software tool was used with XTandem! As the search  
270 engine [60]. The MS2 spectra were searched against the non-redundant Viperidae protein NCBI  
271 (taxid: 8689, 3rd Nov 2017, 1727 sequences), our in-house *Vipera kaznakovi* toxin sequence database  
272 (translated from our venom gland transcriptomic analyses; 46 toxin sequences) and a set of proteins  
273 found as common contaminants (CRAP, 116 sequences), containing in total 1889 sequences. Mass  
274 accuracy was set to 10 ppm for the precursor mass and 0.2  $m/z$  for the MS2 level. Alkylation of Cys  
275 was set as fixed modification and acetylation of the N-terminus, of Lys as well as oxidation of Met  
276 were allowed as variable modifications. A false discovery rate (FDR) was estimated through a target-

277 decoy approach and a cut-off of 1% was applied. All PSMs were validated manually and at least 2  
278 PSMs were required for a protein ID to be considered.

279 For the top-down data analysis, the .raw data were converted to .mzXML files using MSconvert of the  
280 ProteoWizard package (<http://proteowizard.sourceforge.net>; version 3.0.10328), and multiple charged  
281 spectra were deconvoluted using the XTRACT algorithm of the Xcalibur Qual Browser version 2.2  
282 (Thermo, Bremen, Germany). For isotopically unresolved spectra, charge distribution deconvolution  
283 was performed using the software tool magic transformer (MagTran).

284

## 285 2.9. Multivariable statistics

286 Principal component analysis (PCoA), using the relative percentages of the major toxin families as  
287 well as different proteoforms as a variable, was applied to explain determinants of compositional  
288 variation among venoms. PCoA was performed in R (R Foundation for Statistical Computing, 2016)  
289 with the extension Graphic Package rgl, available from <https://www.R-Project.org>.

290

## 291 2.10. Data sharing

292 Mass spectrometry proteomics data (.mgf, .raw and results files and search database) have been  
293 deposited to ProteomeXchange [61] with the ID PXD010857 via the MassIVE partner repository  
294 under project name “Venom proteomics of *Vipera kaznakovi*” and massive ID MSV000082845.

295 Raw sequencing reads and the assembled contigs generated for the venom gland transcriptome (.fastq  
296 and .fasta, respectively) have been deposited in the NCBI sequence read archive (SRA) under  
297 accession SRR8198764 and linked to the BioProject identifier PRJNA505487.

298

## 299 **3. Results and Discussion**

### 300 3.1. Field work and venom toxicity

301 The medium-sized Caucasian viper (*Vipera kaznakovi*) mainly inhabits the forested slopes of  
302 mountain peaks with a distribution range from the Caucasian Black Sea coast provinces of  
303 northeastern Turkey, through Georgia to Russia (**Figure 1**). *V. kaznakovi* feeds predominately on  
304 small vertebrates (mice, lizards, etc.) or insects, and a specific characteristic of this species is the

305 complete black coloration with elements of orange to red zigzag-looking strip on the upper side of the  
306 body (**Figure 1**).

307 During our fieldwork in June 2015 we collected nine *V. kaznakovi* individuals (6 adults and 3  
308 juveniles) in their natural habitat, whose venom was extracted by using a parafilm-covered laboratory  
309 beaker before the snakes were released back into their natural environment. The different *V. kaznakovi*  
310 individuals were found in Hopa (6 spec.), Borçka (2 spec.) and Arhavi (1 spec.) districts of the Artvin  
311 province (**Figure 1**). The LD<sub>50</sub> mean values of venom pooled from all collected *V. kaznakovi*  
312 individuals was assessed by the intraperitoneal (IP) route using a random sample survey of five swiss  
313 mice for three venom dose (5, 2 and 1 mg/kg), which is summarized in supplemental table 1. The  
314 LD<sub>50</sub> mean value obtained for the pooled *V. kaznakovi* venom was calculated as ~2.6 mg/kg and can  
315 categorized to have slightly weaker toxicity in this model, compared to other related viper species  
316 (0.9-1.99 mg/kg) [62–65].

### 317 318 3.2. Venom gland transcriptomics

319 The *V. kaznakovi* venom gland transcriptome resulted in 1,742 assembled contigs, of which 46  
320 exhibited gene annotations relating to 15 venom toxin families previously described in the literature  
321 (**Figure 2**). The majority of these contigs (33) encode genes, expressing toxin isoforms relating to  
322 four multi-locus gene families, namely the svMPs, CTLs, svSPs and PLA<sub>2</sub>s (**Figure 2**). Moreover,  
323 these four toxin families also exhibited the highest expression levels of the toxin families identified; in  
324 combination accounting for >78% of all toxin expressions (**Figure 2**). These findings are consistent  
325 with many prior studies of viperid venom gland transcriptomes [10,12,49,66,67].

326 The svMPs were the most abundantly expressed of the toxin families, accounting for 33.4% of the  
327 total toxin expression, and were encoded by 17 contigs (**Figure 2**). However, these contig numbers  
328 are likely to be an overestimation of the total number of expressed svMP genes found in the *V.*  
329 *kaznakovi* venom gland, as six of these contigs were incomplete and non-overlapping in terms of their  
330 nucleotide sequence, and therefore likely reflect a degree of low transcriptome coverage and/or under-  
331 assembly. Of those contigs that we were able to identify to svMP class level (e.g. P-I, P-II or P-III  
332 [68,69]), ten exhibited structural domains unique to P-III svMPs, one to P-II svMPs and one to a short

333 coding disintegrin. Interestingly, the svMP contig that exhibited the highest expression level encoded  
334 for the sole P-II svMP (5.1% of all venom toxins), whereas the short coding disintegrin, which  
335 exhibited 98% identity to the platelet aggregation inhibitor lebein-1-alpha from *Macrovipera lebetina*  
336 [70], was more moderately expressed (2.1%). Interestingly, we found no evidence for the  
337 representation of the P-I class of svMPs in the *V. kaznakovi* venom gland transcriptome.

338 The CTLs were the next most abundant toxin family, with six contigs representing 27.5% of all toxin  
339 gene expression (**Figure 2**). Interestingly, one of these CTLs, which exhibits the closest similarity to  
340 snaclec-7 from *Vipera ammodytes* venom (GenBank: APB93444.1), was by far the most abundantly  
341 expressed toxin identified in the venom gland transcriptome (15.4% of all toxins) (**Figure 2**). We  
342 identified lower expression levels for the multi-locus svSP and PLA<sub>2</sub> toxin families, which accounted  
343 for 9.2% and 8.1% of the toxins, expressed in the venom gland transcriptome respectively, and were  
344 encoded by seven and three contigs (**Figure 2**). Of the remaining toxin families identified, only two  
345 exhibited expression levels >3% of the total toxin expression; CRISPs were encoded by two contigs  
346 amounting to 5.4% of total toxin expression, and LAAO by a single contig representing 4.23%  
347 (**Figure 2**). The remaining nine, lowly expressed, toxin families identified in the venom gland  
348 transcriptome are displayed in Figure 2, and combined amounted to 12.1% of total toxin expression.

349

### 350 3.3 Decomplexed proteomics of pooled venom

351 To broadly characterize the venom composition of *V. kaznakovi*, in an initial experiment, we  
352 performed bottom-up analysis of pooled venom by reversed phase-HPLC separation (**Figure 3A**) and  
353 direct online intact mass analysis by ESI-HR-MS (**Figure 3B**). The prominent bands of the subsequent  
354 separation by SDS-PAGE (**Figure 3C**) were excised followed by trypsin in-gel digestion and LC-  
355 MS/MS analysis. During the first analysis we did not have a species-specific transcriptome database  
356 available, hence the spectra were analyzed by *de novo* sequencing. The resulting sequence tags were  
357 searched against the NCBI non-redundant viperid protein database using BLAST [59]. The 57  
358 sequence tags resulted in the identification of 25 proteins covering 7 toxin families (**Table 1**), namely  
359 svMP, PLA<sub>2</sub>, svSP, CTL, CRISP, VEGF and LAAO.

360 *De novo* sequencing of MS/MS spectra of native small peptides (peaks 1-9) resulted in four additional  
361 sequence tags and the identification of a svMP inhibitor (svMP-i) and two bradykinin potentiating  
362 peptides (BPP). When we obtained the assembled transcriptome data, we re-analyzed the MS/MS data  
363 from the tryptic peptides by peptide spectrum matching (PSM) using the translated protein sequences  
364 of the transcriptome as well as the NCBI viperidae protein database. PSM resulted in 114 peptide  
365 matches in total, which doubled the number of annotated spectra in comparison to the *de novo*  
366 annotation. The analysis revealed the same seven major toxin families as identified by the tryptic *de*  
367 *nov*o tags, but showed with 29 identified proteins (compared to 25 by the above approach) a slight  
368 improvement. Not surprisingly, most of the peptide matches were from the transcriptome derived  
369 sequences and only six protein IDs came from other viperid sequences from the NCBI database.  
370 Relative quantification through integration of the UV-HPLC peaks and densitometric analysis of the  
371 SDS-gels revealed that the most abundant toxin families were svMP (37.7%), followed by PLA<sub>2</sub>  
372 (19.0%), svSP (9.6%), LAAO (7.1%), CTL (6.9%), CRISP (5.0%), and VEGF (0.3%). In the small  
373 molecular mass range < 2kDa, SVMP-i contributed 12.6%, BPP 2.0%, and unknown peptides 4.0% to  
374 the overall venom composition (**Figure 3D**).

375 Comparing the abundance of venom toxins (**Figure 3D**) with transcriptomic predictions of expression  
376 (**Figure 2A**), we observed an overall positive correlation, but we noted some major differences,  
377 particularly relating to the CTLs: transcriptomic expression levels showed CTLs to be the second  
378 most abundant toxin family (27.5% of all toxin contigs) while proteomic analysis shows a much lower  
379 occurrence (6.9%). Interestingly, some of the molecular masses observed for CTLs (~20 kDa) during  
380 SDS-PAGE did not correspond to the expected molecular mass derived from the transcriptome  
381 sequence. As reported in other studies, we assume that some of the observed CTLs are hetero-dimers  
382 [71]. SvMPs showed highly consistent profiles, as both the most abundantly expressed (33.4%) and  
383 translated (32.7%) toxin family. Similarly, the svSPs (9.2%) and CRISPs (5.4%) exhibited  
384 transcription levels highly comparable to their relative protein abundance in venom (9.6% and  
385 5.02%). A lower transcription level was shown for PLA<sub>2</sub> (8.1%) in contrast to the two times higher  
386 protein level (19.0%). As anticipated, with the exception of VEGF (2.0% T; 0.4% P) and svMP-i

387 (1.7%; 12.6%) as part of the peptidic content, other lowly expressed ‘toxin’ families could not be  
388 assigned on the proteomic level.

389 The observed discrepancies in proteomic abundance and transcriptomic expression (e.g. CTLs and  
390 PLA<sub>2</sub>s) is influenced by many factors, e.g. post-genomic factors acting on toxin genes [49], such as  
391 the regulation of expression patterns by MicroRNAs (miRNA) [7,72], degradation processes [73],  
392 systematic or stochastic variations [74] or technical limitations in the experimental approach,  
393 including the eventually lower sensitivity of the proteomics workflow. Perhaps most importantly it  
394 needs to be mentioned that here we compared the toxin transcription level of a single individual (adult  
395 female) to a pooled venom protein sample (n=9), and thus, while it is possible that these differences  
396 are predominately due to the above mentioned regulatory processes, it seems likely that intra-specific  
397 venom variations may influence our findings. Due to understandable sampling/ethical restrictions  
398 relating to the sacrifice of individuals, we were unable to sequence venom gland transcriptomes of  
399 multiple specimens of *V. kaznakovi*.

400 The previous proteomic characterization of the *V. kaznakovi* venom by Utkin and coworkers was  
401 performed by in-solution trypsin proteolysis followed by nanoLC-MS/MS [52]. The PSM against a  
402 full NCBI Serpentes database identified 116 proteins from 14 typical snake venom protein families.  
403 The semi-quantitative venom composition showed PLA<sub>2</sub> (41%) as the most abundant component,  
404 followed by svMPs (16%), CTL (12%), svSP (11%), CRISP (10%), LAAO (4%), VEGF (4%) and  
405 other lowly abundant proteins (< 1%) [52]. Besides the additional detection of lowly abundant  
406 proteins, the main difference to our results are the considerably higher levels of PLA<sub>2</sub> and the lower  
407 abundance of svMPs (~ 4 fold difference for both protein families). The reasons for the additional  
408 detection of lowly abundant proteins could be of technical nature, as the nanoLC-MS/MS and mass  
409 spectrometer used in the study by Utkin *et al.*, is typically more sensitive than the LC-MS/MS setup  
410 we used. While explanations for the major differences in protein abundance could be the different  
411 quantification method applied (UV abundance vs. summed peptide abundance [52]). Furthermore, the  
412 observed variations could also be biological in nature, i.e. the result of intra-specific venom variation,  
413 as the animals were collected in different geographic regions (Krasnodar Territory, Russia [51], with a  
414 distance of ~ 400 km to our collection site). However, as in most other venom proteomics studies the

415 composition was determined from a pooled venom sample (15 individuals [52]), which has the  
416 potential to offset variation among individuals. In order to robustly assess the extent of intra-specific  
417 (e.g. population level) variations in *V. kaznakovi* venom analysis of a representative group of  
418 individuals is necessary.

#### 419 420 3.4 Community venom profiling

421 It seems understandable that many venom studies are undertaken using pooled venom samples due to  
422 the associated costs and analysis time of decomplexing bottom-up venomics studies. In our case, we  
423 fractionated pooled venom from *V. kaznakovi* into 25 fractions and further separated the protein  
424 containing fractions (MW > 5 kDa) by SDS-PAGE. This multidimensional separation resulted in 25  
425 digested peptide samples which we analyzed by LC-MS/MS, requiring ~ 10 h MS run time  
426 (25 min/sample), and an estimated ~\$2,000 costs (\$80/sample). Multiplying this effort and cost by  
427 numerous venom samples from individuals would of course make such a study comparatively  
428 expensive. Hence, many previous studies investigating venom variability within a species have used  
429 pooled venom for in-depth proteomic analysis, and then illuminated individual variability by the  
430 comparison of HPLC chromatograms and/or SDS-PAGE images [50,75,76]. This comparison allows  
431 at best a comparison at the protein family level (if protein families are clearly separated by HPLC or  
432 SDS-PAGE). As an alternative, a comparison by top-down or shotgun proteomics would allow for the  
433 differential comparison on the protein, or potentially proteoform, level performing a single LC-  
434 MS/MS run per individual.

435 However, shotgun approaches are likely to suffer from the aforementioned issues with protein  
436 inference, while top-down approaches have the drawback of not resolving high molecular mass  
437 proteins. This is particularly the case if the identification and comparison of proteins are based on  
438 Protein Spectrum Matching (PrSM), as high molecular weight toxins may not result in isotope  
439 resolved peaks and sufficient precursor signal, and thus are unlikely to provide sufficient fragment  
440 ions. However, a comparison by MS1 mass profiling only [77] would eliminate the problem of  
441 insufficient MS/MS fragments and isotope resolution, as spectra can be easily deconvoluted based on

442 their charge state distribution. Such an approach could be particularly interesting for laboratories that  
443 are equipped with low resolution mass spectrometers.

444 In order to explore the potential of venom comparison by top-down mass profiling, we analyzed the  
445 venoms of nine *V. kaznakovi* individuals by LC-MS using the same chromatographic method as for  
446 our initial HPLC separation of our decomplexing bottom-up venom analysis. Chromatographic peak  
447 extraction of all individuals resulted in 119 consensus extracted ion chromatograms (XIC) or so-called  
448 ion features. The alignment of XICs by retention time and mass enabled the comparison of samples  
449 between individuals, but also a comparison with the mass profile of the pooled venom sample for a  
450 protein level annotation. An overview of all resulting features, including annotations, is shown in  
451 supplemental table 1. Looking at the binary distribution of ion features, individual venoms contained  
452 between 62 and 107 features, with a slightly higher average feature number in juveniles vs. adults.  
453 Comparing the total ion currents (TIC) of the LC-MS runs, the individual with the lowest feature  
454 number also had the lowest overall signal. Hence it is likely that the lower number of features in this  
455 individual was due to lower overall signal intensity and therefore might not be biologically  
456 representative. For further statistical evaluation we thus normalized feature abundance to TIC.  
457 Matching the features to the pooled bottom-up venomomics results yielded an annotation rate between  
458 83.4% and 93.5% of the features (based on XIC peak area). As anticipated, the annotation rate is  
459 slightly lower than the relative annotation of the pooled sample (96.0%; based on the UV<sub>214</sub> peak  
460 area). The comparison of protein family venom compositions is shown in figure 4 and supplemental  
461 table 2. The highest variance was observed for svSP, CTL and LAAO toxin families (**Figure 5A**).  
462 Taking the age of the individuals into account, the abundance of svSPs was generally higher in the  
463 adult individuals than in the juveniles (average of 21.7% vs. 5.5 %), but no significant difference  
464 between male and female individuals, or between different geographic regions was observed. The  
465 svSPs play a significant role in mammalian envenomation by affecting the hemostatic system through  
466 perturbing blood coagulation, typically via the inducement of fibrinolytic effects [78,79]. Taking  
467 this into account, a possible explanation could be that lower svSP concentration in juveniles could be  
468 the result of differences in diet, as young animals typically prey on insects, before switching to feed  
469 upon small mammals and lizards as they become adults [80–82]. Despite their observed variations in



470 abundance, no significant differences between the individual groups could be observed for the CTL  
471 and LAAO toxin families (**Figure 5A**). However, there was evidence that the svSP concentration is  
472 correlated to levels of LAAO, as the three individuals with the lowest svSP abundance showed the  
473 highest content of LAAO (**Figure 5A**). Whether this is a true biological effect or perhaps is the result  
474 of differences in ion suppression of the co-eluting compounds will need further investigation. We also  
475 observed variations between the PLA<sub>2</sub> levels identified in the venoms, which ranged from 6.5-25.1%,  
476 but in all cases remained lower than those previously reported by Kovalchuk *et al.* (41%) [52]. In  
477 order to investigate the inner-species differences by multivariate statistics we performed a principal  
478 coordinate analysis (PCoA) using the Bray-Curtis dissimilarity metric. The PCoA plots of protein-  
479 level and proteoform-level data is shown in figure 5. Clustering of individuals in protein-family level  
480 PCoA space (**Figure 5B**) was only observed for the juvenile individuals. As expected from the  
481 univariate statistics no significant separation based on gender or region could be observed. Since an  
482 explanation for not resolving phenotype differences could be the reductions of variables through the  
483 binning of proteoforms, we used proteoform abundance as input matrix for PCoA. The outcomes of  
484 this analysis revealed a separation between both juvenile and adults, as well as between male and  
485 female snakes (**Figure 5C**). To investigating the toxin variants underpinning these separations, we  
486 used univariate comparison of the two groups and plotted the fold change of toxin abundance (log<sub>2</sub>)  
487 vs. the statistical significance (-log<sub>10</sub> p-value, t-test) shown in supplemental figure 2. Besides the  
488 above mentioned differences in svSP, the most significant (p-value < 0.05, log<sub>2</sub> fold change >2 or <-  
489 2) differences between juvenile and adult individuals was the higher abundance of small proteins with  
490 the masses 7707.26 Da, 5565.02 Da, 5693.10 Da in the juvenile group, all of which were unidentified  
491 in our proteomic analyses. Furthermore, we observed several smaller peptides with the masses  
492 589.27 Da, 1244.56 Da, and 575.26 Da as well as a putative PLA<sub>2</sub>, with the mass of 13667.91 Da that  
493 was more abundant in the juveniles. Contrastingly, a putative PLA<sub>2</sub> with a mass of 13683.86 Da was  
494 of lower abundance in the juvenile group. While we observed fewer significant changes between the  
495 venom toxins of the male and female individuals, the observed masses of the differential features  
496 indicated, that those differential toxins belong to different protein families than those involved in  
497 differentiating between juvenile and adult snakes. Two toxins with the masses 22829.66 Da and

498 24641.23 Da were higher abundant in male individuals and could be putatively annotated as hetero-  
499 dimeric CTLs. Another toxin with the mass 13549.87 was also higher abundant in the male group and  
500 according to the mass range is most likely a PLA<sub>2</sub>.

501

#### 502 **4. Concluding remarks**

503 Here we describe the detailed analysis of the venom composition of *Vipera kaznakovi* by a  
504 combination of venom gland transcriptomics and decomplexing bottom-up and top-down venom  
505 proteomics revealing the presence of 15 toxin families, of which the most abundant toxins were  
506 svMPs (37.7%), followed by PLA<sub>2</sub>s (19.0%), svSPs (9.5%), CTLs (6.9%) and CRISP (5.0%). Intact  
507 mass profiling enabled the rapid comparison of venom sourced from multiple individuals. This  
508 community venomomics approach enabled higher sensitivity of direct intact protein analysis by LC-MS,  
509 in comparison to decomplexing bottom-up venomomics, and thus enabled us working with multiple  
510 venom samples and with low amounts of material (< 0.5 mg venom). This allowed us to capture the  
511 snakes, perform venom extractions and then immediately release the animals back in to the field. Our  
512 approach revealed intraspecific venom variation in *Vipera kaznakovi*, including both ontogenetic  
513 differences between juvenile and adult snakes, and to a lesser extent, sexual differences between adult  
514 males and females. The highest significant difference in venom proteome composition was found  
515 between the adult and juvenile group, with svSP toxins found to exhibit the greatest variance.  
516 However, in addition, individuals within all groups showed a generally high relative variance of CTL  
517 and LAAO concentrations. svMPs on the other hand seemed to be constantly the most abundant  
518 venom component in all *V. kaznakovi* individuals analyzed in our study. However, as the statistical  
519 power with a relatively small subject size (n=9) is limited, it would be interesting to extend this study  
520 to a larger sample cohort, ideally covering all geographical regions (from Northeastern Turkey to  
521 Georgia and Russia) of the *V. kaznakovi* distribution zone. The workflow applied herein would be  
522 well suited for an extensive venom analysis at the population level, and will hopefully enable venom  
523 researchers to more easily expand their experimental approach towards robust comparisons of intra-  
524 species venom variation, and not only characterize pooled venom samples.

## 525 **Author contributions**

526 D.P., A.N. and R.D.S. planned the study. D.P., A.N., B.G., M.K. and P.H. collected the animals and  
527 prepared venom and venom gland tissue samples. A.N. performed the determination of acute lethal  
528 dose. D.P., P.H. and B.-F.H. performed the toxin separation and acquired the mass spectrometry data.  
529 G.W., S.C.W. and N.R.C. constructed the transcriptome. D.P., B.-F.H. and N.R.C. performed the data  
530 analysis. A.N., N.R.C. and R.D.S. acquired funding and provided materials and instruments for the  
531 study. D.P., B.-F.H. and R.D.S. wrote the manuscript. All authors read, discussed and approved the  
532 manuscript.

533

## 534 **Acknowledgements**

535 We thank Sabah Ul-Hasan and Anthony Saviola for critical reading of the paper draft, and Robert  
536 Harrison for assistance with transcriptomics. This study was supported by the Deutsche  
537 Forschungsgemeinschaft (DFG) through the Cluster of Excellence ‘Unifying Concepts in Catalysis  
538 (UniCat), a postdoctoral research scholarship to D.P. (PE 2600/1), the Scientific and Technical  
539 Research Council of Turkey (TÜBİTAK) under Grant 114Z946, and a Sir Henry Dale Fellowship  
540 (200517/Z/16/Z) jointly funded by the Wellcome Trust and the Royal Society to N.R.C

## 541 **References**

- 542 [1] Calvete JJ, Lomonte B. A bright future for integrative venomomics. *Toxicon* 2015;107(Pt B):159–  
543 62.
- 544 [2] Juárez P, Sanz L, Calvete JJ. Snake venomomics: Characterization of protein families in *Sistrurus*  
545 *barbouri* venom by cysteine mapping, N-terminal sequencing, and tandem mass spectrometry  
546 analysis. *Proteomics* 2004;4(2):327–38.
- 547 [3] Calvete JJ. Snake venomomics - from low-resolution toxin-pattern recognition to toxin-resolved  
548 venom proteomes with absolute quantification. *Expert Rev Proteomics* 2018;15(7):555–68.
- 549 [4] Vonk FJ, Casewell NR, Henkel CV, Heimberg AM, Jansen HJ, McCleary RJR et al. The king  
550 cobra genome reveals dynamic gene evolution and adaptation in the snake venom system. *Proc*  
551 *Natl Acad Sci U S A* 2013;110(51):20651–6.
- 552 [5] Aird SD, Arora J, Barua A, Qiu L, Terada K, Mikheyev AS. Population Genomic Analysis of a  
553 Pitviper Reveals Microevolutionary Forces Underlying Venom Chemistry. *Genome Biol Evol*  
554 2017;9(10):2640–9.
- 555 [6] Pla D, Petras D, Saviola AJ, Modahl CM, Sanz L, Pérez A et al. Transcriptomics-guided bottom-  
556 up and top-down venomomics of neonate and adult specimens of the arboreal rear-fanged Brown  
557 Treesnake, *Boiga irregularis*, from Guam. *J Proteomics* 2018;174:71–84.

- 558 [7] Durban J, Sanz L, Trevisan-Silva D, Neri-Castro E, Alagón A, Calvete JJ. Integrated Venomics  
559 and Venom Gland Transcriptome Analysis of Juvenile and Adult Mexican Rattlesnakes *Crotalus*  
560 *simus*, *C. tzabcan*, and *C. culminatus* Revealed miRNA-modulated Ontogenetic Shifts. *J*  
561 *Proteome Res* 2017;16(9):3370–90.
- 562 [8] Aird SD, da Silva NJ, Qiu L, Villar-Briones A, Saddi VA, Pires de Campos Telles M et al.  
563 Coralsnake Venomics: Analyses of Venom Gland Transcriptomes and Proteomes of Six  
564 Brazilian Taxa. *Toxins (Basel)* 2017;9(6).
- 565 [9] Pla D, Sanz L, Whiteley G, Wagstaff SC, Harrison RA, Casewell NR et al. What killed Karl  
566 Patterson Schmidt? Combined venom gland transcriptomic, venomomic and antivenomic analysis  
567 of the South African green tree snake (the boomslang), *Dispholidus typus*. *Biochim Biophys*  
568 *Acta* 2017;1861(4):814–23.
- 569 [10] Gonçalves-Machado L, Pla D, Sanz L, Jorge RJB, Leitão-De-Araújo M, Alves MLM et al.  
570 Combined venomics, venom gland transcriptomics, bioactivities, and antivenomics of two  
571 *Bothrops jararaca* populations from geographic isolated regions within the Brazilian Atlantic  
572 rainforest. *J Proteomics* 2016;135:73–89.
- 573 [11] Fry BG, Scheib H, L M Junqueira Azevedo I de, Silva DA, Casewell NR. Novel transcripts in  
574 the maxillary venom glands of advanced snakes. *Toxicon* 2012;59(7-8):696–708.
- 575 [12] Casewell NR, Harrison RA, Wüster W, Wagstaff SC. Comparative venom gland transcriptome  
576 surveys of the saw-scaled vipers (Viperidae: *Echis*) reveal substantial intra-family gene diversity  
577 and novel venom transcripts. *BMC Genomics* 2009;10:564.
- 578 [13] Rokyta DR, Wray KP, Margres MJ. The genesis of an exceptionally lethal venom in the timber  
579 rattlesnake (*Crotalus horridus*) revealed through comparative venom-gland transcriptomics.  
580 *BMC Genomics* 2013;14:394.
- 581 [14] Tan CH, Tan KY, Fung SY, Tan NH. Venom-gland transcriptome and venom proteome of the  
582 Malaysian king cobra (*Ophiophagus hannah*). *BMC Genomics* 2015;16:687.
- 583 [15] Nawarak J, Sinchaikul S, Wu C-Y, Liau M-Y, Phutrakul S, Chen S-T. Proteomics of snake  
584 venoms from Elapidae and Viperidae families by multidimensional chromatographic methods.  
585 *Electrophoresis* 2003;24(16):2838–54.
- 586 [16] Tasoulis T, Isbister GK. A Review and Database of Snake Venom Proteomes. *Toxins (Basel)*  
587 2017;9(9).
- 588 [17] Lomonte B, Calvete JJ. Strategies in 'snake venomics' aiming at an integrative view of  
589 compositional, functional, and immunological characteristics of venoms. *J Venom Anim Toxins*  
590 *Incl Trop Dis* 2017;23:26.
- 591 [18] Melani RD, Goto-Silva L, Nogueira FCS, Junqueira M, Domont GB. Shotgun Approaches for  
592 Venom Analysis. In: Gopalakrishnakone P, Calvete JJ, editors. *Venom Genomics and*  
593 *Proteomics: Venom Genomics and Proteomics*. Dordrecht: Springer Netherlands; 2014, p. 1–12.
- 594 [19] Nesvizhskii AI, Aebersold R. Interpretation of shotgun proteomic data: The protein inference  
595 problem. *Mol Cell Proteomics* 2005;4(10):1419–40.
- 596 [20] Smith LM, Kelleher NL. Proteoform: A single term describing protein complexity. *Nat Methods*  
597 2013;10(3):186–7.
- 598 [21] Petras D, Heiss P, Süßmuth RD, Calvete JJ. Venom Proteomics of Indonesian King Cobra,  
599 *Ophiophagus hannah*: Integrating Top-Down and Bottom-Up Approaches. *J Proteome Res*  
600 2015;14(6):2539–56.
- 601 [22] Melani RD, Skinner OS, Fornelli L, Domont GB, Compton PD, Kelleher NL. Mapping  
602 Proteoforms and Protein Complexes From King Cobra Venom Using Both Denaturing and  
603 Native Top-down Proteomics. *Mol Cell Proteomics* 2016;15(7):2423–34.

- 604 [23] Petras D, Heiss P, Harrison RA, Süßmuth RD, Calvete JJ. Top-down venomomics of the East  
605 African green mamba, *Dendroaspis angusticeps*, and the black mamba, *Dendroaspis polylepis*,  
606 highlight the complexity of their toxin arsenals. *J Proteomics* 2016;146:148–64.
- 607 [24] Ainsworth S, Petras D, Engmark M, Süßmuth RD, Whiteley G, Albulescu L-O et al. The  
608 medical threat of mamba envenoming in sub-Saharan Africa revealed by genus-wide analysis of  
609 venom composition, toxicity and antivenomics profiling of available antivenoms. *J Proteomics*  
610 2018;172:173–89.
- 611 [25] Damm M, Hempel B-F, Nalbantsoy A, Süßmuth RD. Comprehensive Snake Venomomics of the  
612 Okinawa Habu Pit Viper, *Protobothrops flavoviridis*, by Complementary Mass Spectrometry-  
613 Guided Approaches. *Molecules* 2018;23(8).
- 614 [26] Göçmen B, Heiss P, Petras D, Nalbantsoy A, Süßmuth RD. Mass spectrometry guided venom  
615 profiling and bioactivity screening of the Anatolian Meadow Viper, *Vipera anatolica*. *Toxicon*  
616 2015;107(Pt B):163–74.
- 617 [27] Hempel B-F, Damm M, Göçmen B, Karis M, Oguz MA, Nalbantsoy A et al. Comparative  
618 Venomomics of the *Vipera ammodytes transcaucasiana* and *Vipera ammodytes montandoni* from  
619 Turkey Provides Insights into Kinship. *Toxins (Basel)* 2018;10(1).
- 620 [28] Nalbantsoy A, Hempel B-F, Petras D, Heiss P, Göçmen B, İğci N et al. Combined venom  
621 profiling and cytotoxicity screening of the Radde's mountain viper (*Montivipera raddei*) and  
622 Mount Bulgar Viper (*Montivipera bulgardaghica*) with potent cytotoxicity against human A549  
623 lung carcinoma cells. *Toxicon* 2017;135:71–83.
- 624 [29] Ghezellou P, Garikapati V, Kazemi SM, Strupat K, Ghassempour A, Spengler B. A perspective  
625 view of top-down proteomics in snake venom research. *Rapid Commun Mass Spectrom* 2018.
- 626 [30] Wu S, Brown JN, Tolić N, Meng D, Liu X, Zhang H et al. Quantitative analysis of human  
627 salivary gland-derived intact proteome using top-down mass spectrometry. *Proteomics*  
628 2014;14(10):1211–22.
- 629 [31] Moehring F, Waas M, Keppel TR, Rathore D, Cowie AM, Stucky CL et al. Quantitative Top-  
630 Down Mass Spectrometry Identifies Proteoforms Differentially Released during Mechanical  
631 Stimulation of Mouse Skin. *J Proteome Res* 2018;17(8):2635–48.
- 632 [32] Ntai I, Toby TK, LeDuc RD, Kelleher NL. A Method for Label-Free, Differential Top-Down  
633 Proteomics. *Methods Mol Biol* 2016;1410:121–33.
- 634 [33] Daltry JC, Wüster W, Thorpe RS. Diet and snake venom evolution. *Nature* 1996;379(6565):537–  
635 40.
- 636 [34] Barlow A, Pook CE, Harrison RA, Wüster W. Coevolution of diet and prey-specific venom  
637 activity supports the role of selection in snake venom evolution. *Proc Biol Sci*  
638 2009;276(1666):2443–9.
- 639 [35] Gibbs HL, Mackessy SP. Functional basis of a molecular adaptation: Prey-specific toxic effects  
640 of venom from *Sistrurus rattlesnakes*. *Toxicon* 2009;53(6):672–9.
- 641 [36] Gibbs HL, Sanz L, Sovic MG, Calvete JJ. Phylogeny-based comparative analysis of venom  
642 proteome variation in a clade of rattlesnakes (*Sistrurus* sp.). *PLoS ONE* 2013;8(6):e67220.
- 643 [37] Alape-Girón A, Sanz L, Escolano J, Flores-Díaz M, Madrigal M, Sasa M et al. Snake venomomics  
644 of the lancehead pitviper *Bothrops asper*: Geographic, individual, and ontogenetic variations. *J*  
645 *Proteome Res* 2008;7(8):3556–71.
- 646 [38] Huang H-W, Liu B-S, Chien K-Y, Chiang L-C, Huang S-Y, Sung W-C et al. Cobra venom  
647 proteome and glycome determined from individual snakes of *Naja atra* reveal medically  
648 important dynamic range and systematic geographic variation. *J Proteomics* 2015;128:92–104.
- 649 [39] Jorge RJB, Monteiro HSA, Gonçalves-Machado L, Guarnieri MC, Ximenes RM, Borges-Nojosa  
650 DM et al. Venomomics and antivenomics of *Bothrops erythromelas* from five geographic

- 651 populations within the Caatinga ecoregion of northeastern Brazil. *J Proteomics* 2015;114:93–  
652 114.
- 653 [40] Pimenta DC, Prezoto BC, Konno K, Melo RL, Furtado MF, Camargo ACM et al. Mass  
654 spectrometric analysis of the individual variability of Bothrops jararaca venom peptide fraction.  
655 Evidence for sex-based variation among the bradykinin-potentiating peptides. *Rapid Commun*  
656 *Mass Spectrom* 2007;21(6):1034–42.
- 657 [41] Menezes MC, Furtado MF, Travaglia-Cardoso SR, Camargo ACM, Serrano SMT. Sex-based  
658 individual variation of snake venom proteome among eighteen Bothrops jararaca siblings.  
659 *Toxicon* 2006;47(3):304–12.
- 660 [42] Amorim FG, Costa TR, Baiwir D, Pauw E de, Quinton L, Sampaio SV. Proteopeptidomic,  
661 Functional and Immunoreactivity Characterization of Bothrops moojeni Snake Venom: Influence  
662 of Snake Gender on Venom Composition. *Toxins (Basel)* 2018;10(5).
- 663 [43] Mackessy SP. Venom Ontogeny in the Pacific Rattlesnakes *Crotalus viridis helleri* and *C. v.*  
664 *oreganus*. *Copeia* 1988;1988(1):92.
- 665 [44] Gutiérrez JM, Avila C, Camacho Z, Lomonte B. Ontogenetic changes in the venom of the snake  
666 *Lachesis muta stenophrys* (bushmaster) from Costa Rica. *Toxicon* 1990;28(4):419–26.
- 667 [45] Guércio RAP, Shevchenko A, Shevchenko A, López-Lozano JL, Paba J, Sousa MV et al.  
668 Ontogenetic variations in the venom proteome of the Amazonian snake *Bothrops atrox*.  
669 *Proteome Sci* 2006;4:11.
- 670 [46] Mackessy SP, Sixberry NM, Heyborne WH, Fritts T. Venom of the Brown Treesnake, *Boiga*  
671 *irregularis*: Ontogenetic shifts and taxa-specific toxicity. *Toxicon* 2006;47(5):537–48.
- 672 [47] Calvete JJ, Casewell NR, Hernández-Guzmán U, Quesada-Bernat S, Sanz L, Rokyta DR et al.  
673 Venom Complexity in a Pitviper Produced by Facultative Parthenogenesis. *Sci Rep*  
674 2018;8(1):11539.
- 675 [48] Casewell NR, Wüster W, Vonk FJ, Harrison RA, Fry BG. Complex cocktails: The evolutionary  
676 novelty of venoms. *Trends Ecol Evol (Amst)* 2013;28(4):219–29.
- 677 [49] Casewell NR, Wagstaff SC, Wüster W, Cook DAN, Bolton FMS, King SI et al. Medically  
678 important differences in snake venom composition are dictated by distinct postgenomic  
679 mechanisms. *Proc Natl Acad Sci U S A* 2014;111(25):9205–10.
- 680 [50] Massey DJ, Calvete JJ, Sánchez EE, Sanz L, Richards K, Curtis R et al. Venom variability and  
681 envenoming severity outcomes of the *Crotalus scutulatus scutulatus* (Mojave rattlesnake) from  
682 Southern Arizona. *J Proteomics* 2012;75(9):2576–87.
- 683 [51] Starkov VG, Osipov AV, Utkin YN. Toxicity of venoms from vipers of Pelias group to crickets  
684 *Gryllus assimilis* and its relation to snake entomophagy. *Toxicon* 2007;49(7):995–1001.
- 685 [52] Kovalchuk SI, Ziganshin RH, Starkov VG, Tsetlin VI, Utkin YN. Quantitative Proteomic  
686 Analysis of Venoms from Russian Vipers of Pelias Group: Phospholipases A<sub>2</sub> are the Main  
687 Venom Components. *Toxins (Basel)* 2016;8(4):105.
- 688 [53] Bruce RD. An up-and-down procedure for acute toxicity testing. *Fundam Appl Toxicol*  
689 1985;5(1):151–7.
- 690 [54] Cates CC, McCabe JG, Lawson GW, Couto MA. Core body temperature as adjunct to endpoint  
691 determination in murine median lethal dose testing of rattlesnake venom. *Comp Med*  
692 2014;64(6):440–7.
- 693 [55] Ethical principles and guidelines for experiments on animals. Swiss Academy of Medical  
694 Sciences. Swiss Academy of Sciences. *Experientia* 1996;52(1):1–3.
- 695 [56] Archer J, Whiteley G, Casewell NR, Harrison RA, Wagstaff SC. VTBuilder: A tool for the  
696 assembly of multi isoform transcriptomes. *BMC Bioinformatics* 2014;15:389.

- 697 [57] Götz S, García-Gómez JM, Terol J, Williams TD, Nagaraj SH, Nueda MJ et al. High-throughput  
698 functional annotation and data mining with the Blast2GO suite. *Nucleic Acids Res*  
699 2008;36(10):3420–35.
- 700 [58] Muth T, Weillböck L, Rapp E, Huber CG, Martens L, Vaudel M et al. DeNovoGUI: An open  
701 source graphical user interface for de novo sequencing of tandem mass spectra. *J Proteome Res*  
702 2014;13(2):1143–6.
- 703 [59] Altschul SF, Gish W, Miller W, Myers EW, Lipman DJ. Basic local alignment search tool. *J Mol*  
704 *Biol* 1990;215(3):403–10.
- 705 [60] Barsnes H, Vaudel M. SearchGUI: A Highly Adaptable Common Interface for Proteomics  
706 Search and de Novo Engines. *J Proteome Res* 2018;17(7):2552–5.
- 707 [61] Vizcaíno JA, Deutsch EW, Wang R, Csordas A, Reisinger F, Ríos D et al. ProteomeXchange  
708 provides globally coordinated proteomics data submission and dissemination. *Nat Biotechnol*  
709 2014;32(3):223–6.
- 710 [62] Sket D, Gubensek F, Adamic S, Lebez D. Action of a partially purified basic protein fraction  
711 from *Vipera ammodytes* venom. *Toxicon* 1973;11(1):47–53.
- 712 [63] Oukkache N, El Jaoudi R, Ghalim N, Chgoury F, Bouhaouala B, Mdaghri NE et al. Evaluation  
713 of the lethal potency of scorpion and snake venoms and comparison between intraperitoneal and  
714 intravenous injection routes. *Toxins (Basel)* 2014;6(6):1873–81.
- 715 [64] Calderón L, Lomonte B, Gutiérrez JM, Tarkowski A, Hanson LA. Biological and biochemical  
716 activities of *Vipera berus* (European viper) venom. *Toxicon* 1993;31(6):743–53.
- 717 [65] Haro L de, Robbe-Vincent A, Saliou B, Valli M, Bon C, Choumet V. Unusual neurotoxic  
718 envenomations by *Vipera aspis aspis* snakes in France. *Hum Exp Toxicol* 2002;21(3):137–45.
- 719 [66] Rokyta DR, Lemmon AR, Margres MJ, Aronow K. The venom-gland transcriptome of the  
720 eastern diamondback rattlesnake (*Crotalus adamanteus*). *BMC Genomics* 2012;13:312.
- 721 [67] Junqueira-de-Azevedo ILM, Bastos CMV, Ho PL, Luna MS, Yamanouye N, Casewell NR.  
722 Venom-related transcripts from *Bothrops jararaca* tissues provide novel molecular insights into  
723 the production and evolution of snake venom. *Mol Biol Evol* 2015;32(3):754–66.
- 724 [68] Fox JW, Serrano SMT. Insights into and speculations about snake venom metalloproteinase  
725 (SVMP) synthesis, folding and disulfide bond formation and their contribution to venom  
726 complexity. *FEBS J* 2008;275(12):3016–30.
- 727 [69] Casewell NR, Wagstaff SC, Harrison RA, Renjifo C, Wüster W. Domain loss facilitates  
728 accelerated evolution and neofunctionalization of duplicate snake venom metalloproteinase toxin  
729 genes. *Mol Biol Evol* 2011;28(9):2637–49.
- 730 [70] Gasmi A, Srairi N, Guerrazi S, Dekhil H, Dkhil H, Karoui H et al. Amino acid structure and  
731 characterization of a heterodimeric disintegrin from *Vipera lebetina* venom. *Biochim Biophys*  
732 *Acta* 2001;1547(1):51–6.
- 733 [71] Navdaev A, Clemetson JM, Polgar J, Kehrel BE, Glauner M, Magnenat E et al. Aggrexin, a  
734 heterodimeric C-type lectin from *Calloselasma rhodostoma* (Malayan pit viper), stimulates  
735 platelets by binding to  $\alpha 2\beta 1$  integrin and glycoprotein Ib, activating Syk and phospholipase  $C\gamma 2$ ,  
736 but does not involve the glycoprotein VI/Fc receptor  $\gamma$  chain collagen receptor. *J Biol Chem*  
737 2001;276(24):20882–9.
- 738 [72] Durban J, Pérez A, Sanz L, Gómez A, Bonilla F, Rodríguez S et al. Integrated "omics" profiling  
739 indicates that miRNAs are modulators of the ontogenetic venom composition shift in the Central  
740 American rattlesnake, *Crotalus simus simus*. *BMC Genomics* 2013;14:234.
- 741 [73] Vogel C, Marcotte EM. Insights into the regulation of protein abundance from proteomic and  
742 transcriptomic analyses. *Nat Rev Genet* 2012;13(4):227–32.
- 743 [74] Ruggles KV, Krug K, Wang X, Clauser KR, Wang J, Payne SH et al. Methods, Tools and  
744 Current Perspectives in Proteogenomics. *Mol Cell Proteomics* 2017;16(6):959–81.

- 745 [75] Calvete JJ, Sanz L, Pérez A, Borges A, Vargas AM, Lomonte B et al. Snake population  
746 venomics and antivenomics of *Bothrops atrox*: Paedomorphism along its transamazonian  
747 dispersal and implications of geographic venom variability on snakebite management. *J*  
748 *Proteomics* 2011;74(4):510–27.
- 749 [76] Galizio NdC, Serino-Silva C, Stuginski DR, Abreu PAE, Sant'Anna SS, Grego KF et al.  
750 Compositional and functional investigation of individual and pooled venoms from long-term  
751 captive and recently wild-caught *Bothrops jararaca* snakes. *J Proteomics* 2018;186:56–70.
- 752 [77] Fry BG, Wickramaratna JC, Hodgson WC, Alewood PF, Kini RM, Ho H et al. Electrospray  
753 liquid chromatography/mass spectrometry fingerprinting of *Acanthophis* (death adder) venoms:  
754 Taxonomic and toxicological implications. *Rapid Commun Mass Spectrom* 2002;16(6):600–8.
- 755 [78] Serrano SMT. The long road of research on snake venom serine proteinases. *Toxicon*  
756 2013;62:19–26.
- 757 [79] Slagboom J, Kool J, Harrison RA, Casewell NR. Haemotoxic snake venoms: Their functional  
758 activity, impact on snakebite victims and pharmaceutical promise. *Br J Haematol*  
759 2017;177(6):947–59.
- 760 [80] Dias GS, Kitano ES, Pagotto AH, Sant'anna SS, Rocha MMT, Zelanis A et al. Individual  
761 variability in the venom proteome of juvenile *Bothrops jararaca* specimens. *J Proteome Res*  
762 2013;12(10):4585–98.
- 763 [81] Gibbs HL, Sanz L, Chiucci JE, Farrell TM, Calvete JJ. Proteomic analysis of ontogenetic and  
764 diet-related changes in venom composition of juvenile and adult Dusky Pigmy rattlesnakes  
765 (*Sistrurus miliarius barbouri*). *J Proteomics* 2011;74(10):2169–79.
- 766 [82] Zelanis A, Tashima AK, Rocha MMT, Furtado MF, Camargo ACM, Ho PL et al. Analysis of the  
767 ontogenetic variation in the venom proteome/peptidome of *Bothrops jararaca* reveals different  
768 strategies to deal with prey. *J Proteome Res* 2010;9(5):2278–91.
- 769 [83] Geniez P. Snakes of Europe, North Africa & the Middle East: A photographic guide. Princeton:  
770 Princeton University Press; 2018.
- 771



**Table 1. Venom Protein Identifications from *Vipera kaznakovi*.** The table shows all protein identification of HPLC fractions (Fig. 3) by LC-MS and LC-MS/MS analysis from pooled venom. Peak numbering corresponds to the UV and MS chromatograms. Sequence tags were obtained by analysis of tryptic peptides by MS/MS de novo sequencing and/or peptide spectrum matching. Molecular weights of intact proteins were determined by SDS-PAGE and intact mass profiling (LC-MS).

| Peak  | Retention Time | SDS-PAGE Band | Area% SDS-PAGE | Area (214 nm) | Mass [Da] (ESI-MS)         | Mass [kDa] (SDS-PAGE) | Mass tryptic peptide [m/z]      | charge [tryptic] | Sequence [PSM]              | Prot-ID               | Mass tryptic peptide [m/z] | charge | Sequence (de novo) | Identity (blast)                | e-value                 | Accession Number | Protein Family           |      |      |
|-------|----------------|---------------|----------------|---------------|----------------------------|-----------------------|---------------------------------|------------------|-----------------------------|-----------------------|----------------------------|--------|--------------------|---------------------------------|-------------------------|------------------|--------------------------|------|------|
| 1     | 20.1           |               |                | 78423         |                            |                       |                                 |                  |                             |                       | -                          | -      | pEQW               | tripeptide SVMPi                | -                       | -                | svMP-i                   |      |      |
| 2     | 27.4           |               |                | 3701          | 443.22                     |                       |                                 |                  |                             |                       | -                          | -      |                    | unknown                         | -                       | -                | Peptide                  |      |      |
| 3     | 28.2           |               |                | 1928          | 3390.6                     |                       |                                 |                  |                             |                       | -                          | -      |                    | unknown                         | -                       | -                | Peptide                  |      |      |
| 4     | 30.3           |               |                | 11784         | 3942.84<br>860.3<br>822.40 |                       |                                 |                  |                             |                       | -                          | -      | -                  | unknown                         | -                       | -                | -                        |      |      |
|       |                |               |                |               |                            |                       |                                 |                  |                             |                       | -                          | -      | EPGEEDW            | Bradykinin-potentiating peptide | -                       | BAN04688.1       | BPP                      |      |      |
|       |                |               |                |               |                            |                       |                                 |                  |                             |                       | -                          | -      | pEKWPGPK           | Bradykinin-potentiating peptide | -                       | BAN04688.1       | BPP                      |      |      |
| 5     | 32.6           |               |                | 1075          | 3118.50<br>680.29          |                       |                                 |                  |                             |                       | -                          | -      | -                  | unknown                         | -                       | -                | Peptide                  |      |      |
|       |                |               |                |               |                            |                       |                                 |                  |                             |                       | -                          | -      | -                  | unknown                         | -                       | -                | Peptide                  |      |      |
| 6     | 35.7           |               |                | 3117          | 3665.65                    |                       |                                 |                  |                             |                       | -                          | -      | -                  | unknown                         | -                       | -                | Peptide                  |      |      |
| 7     | 36.8           |               |                | 2039          | 13848.70                   |                       |                                 |                  |                             |                       | -                          | -      | -                  | unknown                         | -                       | -                | unkno<br>wn              |      |      |
| 8     | 41.2           |               |                | 18410         | 1101.56                    |                       |                                 |                  |                             |                       | -                          | -      | K/QPGPVSV          | unkown                          | -                       | -                | Peptide                  |      |      |
| 9     | 49.7           |               |                | 2706          | 7228.20<br>6680.95         |                       |                                 |                  |                             |                       | -                          | -      | -                  | unknown                         | -                       | -                | unkow<br>n<br>unkow<br>n |      |      |
|       |                |               |                |               |                            |                       |                                 |                  |                             |                       | -                          | -      | -                  | unknown                         | -                       | -                | unkow<br>n               |      |      |
| 10    | 50.4           | 10A           | 35%            | 6454          |                            | 14                    | 526.28                          | 2                | PEXEYQOR                    |                       | 526.28                     | 2      | PEXEYQOR           | Nerve groth factor              | 2.2E-02                 | P83942.1         |                          |      |      |
|       |                |               |                |               |                            |                       | 556.8                           | 2                | HTVDXQXM*R                  | T0203_R_0.0314_L_1049 | 556.8                      | 2      | HTVDXQXM           | Nerve groth factor              | 5.1E-02                 |                  | VEGF                     |      |      |
|       |                |               |                |               |                            |                       | 1053.89                         | 3                | ETXVPXXQYEPDEXSDXFRPSCVAVXR |                       | -                          | -      | -                  | -                               | -                       | -                | -                        |      |      |
|       |                | 10B           | 65%            |               |                            | 15                    | 903.93                          | 2                | AAAXCFGENVNTYDKK            | F8QN51.1              | 605.63                     | 3      | AAAXCFGENVNTYDKK   | acidic phospholipase A2         | 3.0E-08                 | F8QN51.1         |                          |      |      |
|       |                |               |                |               |                            |                       | 758.76                          | 2                | pCCFVHDCCYGR                |                       | 853.46                     | 1      | NXFQFGK            | acidic phospholipase A2         | 1.1E+00                 |                  | PLA2                     |      |      |
|       |                |               |                |               |                            |                       | 910.38                          | 3                | M*DTYSYSFXNGDXVCGDDPCXR     | T1290_R_0.0575_L_419  | 616.77                     | 2      | MFCAGYXEGGK        | cationic trypsin-3-like         | 4.0E-05                 | XP_015670852.1   |                          |      |      |
|       |                |               |                |               |                            |                       | 796.67                          | 3                | SAYGCYCGWGGQRPQDPTDR        |                       | -                          | -      | -                  | -                               | -                       | -                |                          |      |      |
| 11,12 | 61.21; 61.69   | 11,12         | 100%           | 456<br>62431  |                            | 15                    | 900.93                          | 2                | AAAXCFGENVNTYDKK            | F8QN51.1              | 605.63                     | 3      | AAAXCFGENVNTYDKK   | acidic phospholipase A2         | 3.0E-08                 | F8QN51.1         |                          |      |      |
|       |                |               |                |               |                            |                       | 13557.7;<br>13540.8;<br>13523.7 | 2                | M*DTYSYSFXN*GDXXVCDGDDPCXR  |                       | -                          | -      | -                  | -                               | -                       | -                | -                        | PLA2 |      |
|       |                |               |                |               |                            |                       | 796.67                          | 3                | SAYGCYCGWGGQRPQDPTDR        | T1290_R_0.0575_L_419  | -                          | -      | -                  | -                               | -                       | -                | -                        | PLA2 |      |
|       |                |               |                |               |                            |                       | 1008.12                         | 3                | SAXXSYSAYGICYGWWGGQRPQDPTDR |                       | -                          | -      | -                  | -                               | -                       | -                | -                        | -    |      |
| 13    | 64.4           |               |                | 1798          | 13541.78                   |                       |                                 |                  |                             |                       |                            |        |                    |                                 |                         | unkno<br>wn      |                          |      |      |
| 14    | 69.7           |               |                | 962           | 24671.29                   |                       |                                 |                  |                             |                       |                            |        |                    |                                 |                         | unkno<br>wn      |                          |      |      |
| 15    | 70.5           | 15A           | 71%            | 45974         |                            | 25                    | 555.75                          | 2                | Q*GCNNYXK                   |                       | 545.94                     | 3      | QGCNNYXK           | cyteine-rich venom protein      | 3.0E-03                 | B7FD11.1         |                          |      |      |
|       |                |               |                |               |                            |                       | 692.38                          | 3                | KPEXQN*EXDXHNSXRR           |                       | 569.75                     | 2      | KPEXQNEXXDXHNSXR   | cyteine-rich venom protein      | 3.0E-05                 | XP_015678374.1   |                          |      |      |
|       |                |               |                |               |                            |                       | 583.26                          | 2                | NVDFDESPR                   |                       | 640.34                     | 3      | WTAXXHEWHGEEK      | cyteine-rich venom protein      | 4.0E-07                 | B7FD11.1         | CRISP                    |      |      |
|       |                |               |                |               |                            |                       | 769.34                          | 2                | M*EWYPEAANAER               | B7FD11.1              | 555.75                     | 2      | SVDPDFSESPR        | cyteine-rich venom protein      | 2.0E-05                 | P86537.1         |                          |      |      |
|       |                |               |                |               |                            |                       | 581.3                           | 2                | SVNPTASNM*XK                |                       | -                          | -      | -                  | -                               | -                       | -                | -                        | -    | -    |
|       |                |               |                |               |                            |                       | 526.24                          | 2                | VDFDESPR                    |                       | -                          | -      | -                  | -                               | -                       | -                | -                        | -    | -    |
|       |                |               |                |               |                            |                       | 924.13                          | 3                | DFVYGGGASPANAVVGHYTQXVWYK   |                       | -                          | -      | -                  | -                               | -                       | -                | -                        | -    | -    |
|       |                |               |                |               |                            |                       |                                 |                  |                             |                       |                            |        |                    |                                 |                         |                  |                          |      |      |
|       |                | 15B           | 29%            |               |                            |                       | 13                              | 645.32           | 2                           | HXSQFGDMXNK           |                            | 645.32 | 2                  | HXSQFGDMXNK                     | ammodytin II(A) variant | 6.0E-04          | CAE47141.1               |      |      |
|       |                |               |                |               |                            |                       |                                 | 758.76           | 2                           | pCCFVHDCCYGR          | Q910A1                     | -      | -                  | -                               | -                       | -                | -                        | -    | PLA2 |
|       |                |               |                |               |                            |                       | 620.96                          | 3                | VAAAXCFGENMNTYDQKK          |                       | 625.63                     | 3      | VAAAXCFGENMNTYDQK  | ammodytin II(A) variant         | 3.0E-09                 | CAE47176.1       |                          |      |      |

| Peak   | Retention Time | SDS-PAGE Band         | Area% SDS-PAGE | Area (214 nm)    | Mass [Da] (ESI-MS) | Mass [kDa] (SDS-PAGE) | Mass tryptic peptide [m/z] | charge [tryptic]              | Sequence [PSM]                 | Prot-ID               | Mass tryptic peptide [m/z]    | charge                | Sequence (de novo)            | Identity (blast)                        | e-value      | Accession Number                        | Protein Family      |                                       |         |            |                        |                                       |         |          |      |
|--------|----------------|-----------------------|----------------|------------------|--------------------|-----------------------|----------------------------|-------------------------------|--------------------------------|-----------------------|-------------------------------|-----------------------|-------------------------------|-----------------------------------------|--------------|-----------------------------------------|---------------------|---------------------------------------|---------|------------|------------------------|---------------------------------------|---------|----------|------|
| 16,17  | 73.34; 74.43   | 17A                   | 27%            | 56120            | 51761              | 50                    | 655.69                     | 3                             | FXTNFKPDCXXRPSR                | T0053_R_0.0734_L_1810 | 714.9                         | 2                     | VPXVGVEFWXNR                  | snake venom metalloproteinase III       | 5.0E-04      | ADW54336.1                              | svMP                |                                       |         |            |                        |                                       |         |          |      |
|        |                |                       |                |                  |                    |                       | 729.8                      | 2                             | SECDXPEYCTGK                   |                       | 684.88                        | 2                     | XVXVVDHSMVEK                  | snake venom metalloproteinase           | 9.0E-05      | AD147673.1                              |                     |                                       |         |            |                        |                                       |         |          |      |
|        |                |                       |                |                  |                    |                       | 594.28                     | 2                             | XGQDXY YCR                     |                       | -                             | -                     | -                             | -                                       | -            | -                                       |                     |                                       |         |            |                        |                                       |         |          |      |
|        |                |                       |                |                  |                    |                       | 570.95                     | 3                             | KEN*DVXPFCAPEDVK               |                       | -                             | -                     | -                             | -                                       | -            | -                                       |                     |                                       |         |            |                        |                                       |         |          |      |
|        |                | 16, 17B               | 73%            | 13675.9          | 14                 | 645.32                | 2                          | HXSQFGDMXNK                   | 645.32                         | 2                     | HXSQFGDMXNK                   | Q910A1                | 645.32                        | 2                                       | HXSQFGDMXNK  | ammodytin II(A) variant                 | 6.0E-04             | CAE47141.1                            | PLA2    |            |                        |                                       |         |          |      |
|        |                |                       |                |                  |                    | 758.77                | 2                          | pCCFVHDCCYGR                  | -                              | -                     | -                             |                       | -                             | -                                       | -            |                                         |                     |                                       |         |            |                        |                                       |         |          |      |
|        |                |                       |                |                  |                    | 620.96                | 3                          | VAAAXCFGEN*MTYDQKK            | 625.63                         | 3                     | VAAAXCAFENMNTYDQK             |                       | ammodytin II(A) variant       | 3.0E-09                                 | CAE47176.1   |                                         |                     |                                       |         |            |                        |                                       |         |          |      |
|        |                |                       |                | 670.31           | 2                  | YMLYSIFDCK            | -                          | -                             | -                              | -                     | -                             | -                     | -                             | -                                       | -            |                                         |                     |                                       |         |            |                        |                                       |         |          |      |
| 18     | 80.6           | 18A                   | 18%            | 90949            | N.D.               | 65                    | 670.89                     | 2                             | XVXVVDHSM*VTK                  | T0033_R_0.0599_L_2024 | 670.89                        | 2                     | XVXVVDHSMVTK                  | snake venom metalloproteinase group III | 1.0E-04      | CAJ01689.1                              | svMP                |                                       |         |            |                        |                                       |         |          |      |
|        |                |                       |                |                  |                    |                       | 540.79                     | 2                             | YN*SDXTVXR                     |                       | 540.79                        | 2                     | YNSDXTVXR                     | snake venom metalloproteinase           | 2.9E-01      | AD147687.1                              |                     |                                       |         |            |                        |                                       |         |          |      |
|        |                |                       |                |                  |                    |                       | 710.39                     | 2                             | VPXVGVEWDHR                    |                       | 710.39                        | 2                     | VPXVGVEWDHR                   | snake venom metalloproteinase           | 6.5E-02      | AD147590.1                              |                     |                                       |         |            |                        |                                       |         |          |      |
|        |                |                       |                |                  |                    |                       | 571.79                     | 2                             | pQXVATSEQQR                    |                       | -                             | -                     | -                             | -                                       | -            | -                                       |                     |                                       |         |            |                        |                                       |         |          |      |
|        |                |                       |                |                  |                    |                       | 567.98                     | 3                             | VNXXNEM*YXPANXR                |                       | -                             | -                     | -                             | -                                       | -            | -                                       |                     |                                       |         |            |                        |                                       |         |          |      |
|        |                |                       |                |                  |                    |                       | 776.75                     | 3                             | KRHDNAQXXTXDFDGSVXGK           |                       | -                             | -                     | -                             | -                                       | -            | -                                       |                     |                                       |         |            |                        |                                       |         |          |      |
|        |                |                       |                |                  |                    |                       | 534.27                     | 3                             | HSVAVVEDYSPXDR                 |                       | -                             | -                     | -                             | -                                       | -            | -                                       |                     |                                       |         |            |                        |                                       |         |          |      |
|        |                | 645                   | 3              | FXTNDKPDCTXXRPSR | -                  | -                     | -                          | -                             | -                              | -                     |                               |                       |                               |                                         |              |                                         |                     |                                       |         |            |                        |                                       |         |          |      |
|        |                | 605.27                | 2              | KGESYFYCR        | 605.27             | 2                     | KGESYFYCR                  | snake venom metalloproteinase | 9.0E-05                        | AD147619.1            |                               |                       |                               |                                         |              |                                         |                     |                                       |         |            |                        |                                       |         |          |      |
|        |                | 862.93                | 2              | KENDVXPFCAPEDXK  | -                  | -                     | -                          | -                             | -                              | -                     |                               |                       |                               |                                         |              |                                         |                     |                                       |         |            |                        |                                       |         |          |      |
|        |                | 18B                   | 8%             | 51600            | 50                 | 655.69                | 3                          | FXTNFKPDCXXRPSR               | 714.9                          | 2                     | VPXVGVEFWXNR                  | T0053_R_0.0734_L_1810 | 714.9                         | 2                                       | VPXVGVEFWXNR | snake venom metalloproteinase group III | 5.0E-04             | ADW54336.1                            | svMP    |            |                        |                                       |         |          |      |
|        |                |                       |                |                  |                    | 729.8                 | 2                          | SECDXPEYCTGK                  | 684.88                         | 2                     | XVXVVDHSMVEK                  |                       | snake venom metalloproteinase | 9.0E-05                                 | AD147673.1   |                                         |                     |                                       |         |            |                        |                                       |         |          |      |
|        |                |                       |                |                  |                    | 594.28                | 2                          | XGQDXY YCR                    | -                              | -                     | -                             |                       | -                             | -                                       | -            |                                         |                     |                                       |         |            |                        |                                       |         |          |      |
|        |                |                       |                |                  |                    | 570.95                | 3                          | KEN*DVXPFCAPEDVK              | -                              | -                     | -                             |                       | -                             | -                                       | -            |                                         |                     |                                       |         |            |                        |                                       |         |          |      |
|        |                |                       |                |                  |                    | 18C                   | 53%                        | 30133                         | 35                             | 821.41                | 3                             |                       | VXGGDECNXNEHPFXAHHTAR         | 835.4                                   | 3            | VXGGDECNXNEHPFXAFVTSDR                  | T1355_R_0.005_L_400 | 835.4                                 |         | 3          | VXGGDECNXNEHPFXAFVTSDR | snake venom serine proteinase nikobin | 2.0E-12 | ESAJX2.1 | svSP |
|        |                |                       |                |                  |                    |                       |                            |                               |                                | 1057.03               | 2                             |                       | FYCAGTLXNQEWVXTAAR            | 590.79                                  | 2            | XMGWGTXSSTK                             |                     | snake venom serine proteinase         |         | 3.0E-05    | ART88740.1             |                                       |         |          |      |
|        |                |                       |                |                  |                    |                       |                            |                               |                                | 587.81                | 2                             |                       | VVCAGXWQGGK                   | 587.81                                  | 2            | VVCAGXWQGGK                             |                     | snake venom serine proteinase nikobin |         | 1.0E-04    | ESAJX2.1               |                                       |         |          |      |
| 748.36 | 3              | C*AGTXXNQEWVXTAAHCNGK | 612.82         | 2                | XMGWGTXTTTK        | 612.82                | 2                          | XMGWGTXTTTK                   | snake venom serine proteinase  | 6.0E-04               | ADE45141.1                    |                       |                               |                                         |              |                                         |                     |                                       |         |            |                        |                                       |         |          |      |
| 611.01 | 3              | XXPDVPHCANXEXXK       | -              | -                | -                  | -                     | -                          | -                             |                                |                       |                               |                       |                               |                                         |              |                                         |                     |                                       |         |            |                        |                                       |         |          |      |
| 890.51 | 1              | VHPEXPAK              | -              | -                | -                  | -                     | -                          | -                             |                                |                       |                               |                       |                               |                                         |              |                                         |                     |                                       |         |            |                        |                                       |         |          |      |
| 18D    | 20%            | 17249                 | 14             | 633.63           | 3                  | KTWEDA EKFC TEQAR     | 714.3                      | 2                             | WTEDAENFCQK                    | T0841_R_0.0782_L_536  | 714.3                         | 2                     | WTEDAENFCQK                   | C-type lectin snalectin-1               | 1.0E-04      | AMB36338.1                              | CTL                 |                                       |         |            |                        |                                       |         |          |      |
|        |                |                       |                | 597.79           | 2                  | SPEEVD FM* XK         | 597.79                     | 2                             | SPEEVD FMXK                    |                       | C-type lectin-like protein 2B | 1.1E-02               | AJO70722.1                    |                                         |              |                                         |                     |                                       |         |            |                        |                                       |         |          |      |
|        |                |                       |                | 521.81           | 2                  | ADXVWXGXR             | 584.33                     | 2                             | HXATXEWXGK                     |                       | C-type lectin snalectin A16   | 1.8E-01               | B4XSZ1.1                      |                                         |              |                                         |                     |                                       |         |            |                        |                                       |         |          |      |
| 19,20  | 85.32; 86.63   | 19,20                 | 100%           | 32261            | 49299              | 50                    | 594.28                     | 2                             | XGQDXY YCR                     | T0053_R_0.0734_L_1810 | 594.28                        | 2                     | XGQDXY YCR                    | zinc metalloproteinase disintegrin-like | 1.4E-01      | Q0NZX8.1                                | svMP                |                                       |         |            |                        |                                       |         |          |      |
|        |                |                       |                |                  |                    |                       | 1053.5                     | 3                             | HDNAQXXTAXDFDGPFXGXAHMSSMCSK   |                       | 684.88                        | 2                     | XVXVVDHSMVEK                  | snake venom metalloproteinase           | 9.0E-05      | AD147673.1                              |                     |                                       |         |            |                        |                                       |         |          |      |
|        |                |                       |                |                  |                    |                       | 1111.51                    | 3                             | SVAFVEDYSPXDHMVASTMAHEMGHNXGMR |                       | 714.9                         | 2                     | VPXVGVEFWXNR                  | snake venom metalloproteinase group III | 5.0E-04      | ADW54336.1                              |                     |                                       |         |            |                        |                                       |         |          |      |
|        |                |                       |                |                  |                    |                       | 655.68                     | 3                             | FXTNFKPDCXXRPSR                |                       | 987.47                        | 2                     | pEXVATSEQSY YDRFR             | 987.47                                  | 2            | pEXVATSEQSY YDRFR                       |                     | snake venom metalloproteinase         | 2.0E-10 | AD147633.1 |                        |                                       |         |          |      |
|        |                |                       |                |                  |                    |                       | 987.86                     | 2                             | SWVQCSGECC EOCR                |                       | -                             | -                     | -                             | -                                       | -            | -                                       |                     |                                       |         |            |                        |                                       |         |          |      |
|        |                |                       |                |                  |                    |                       | 729.8                      | 2                             | SECDXPEYCTGK                   |                       | -                             | -                     | -                             | -                                       | -            | -                                       |                     |                                       |         |            |                        |                                       |         |          |      |
|        |                |                       |                |                  |                    |                       | 570.95                     | 3                             | KEN*DVXPFCAPEDVK               |                       | -                             | -                     | -                             | -                                       | -            | -                                       |                     |                                       |         |            |                        |                                       |         |          |      |
|        |                |                       |                |                  |                    |                       | 1007.49                    | 1                             | XYCEXVFN                       |                       | -                             | -                     | -                             | -                                       | -            | -                                       |                     |                                       |         |            |                        |                                       |         |          |      |

| Peak | Retention Time | SDS-PAGE Band    | Area % SDS-PAGE | Area (214 nm) | Mass [Da] (ESI-MS) | Mass [kDa] (SDS-PAGE)         | Mass tryptic peptide [m/z] | charge [tryptic] | Sequence [PSM]        | Prot-ID                | Mass tryptic peptide [m/z] | charge | Sequence (de novo)   | Identity (blast)                        | e-value | Accession Number | Protein Family |
|------|----------------|------------------|-----------------|---------------|--------------------|-------------------------------|----------------------------|------------------|-----------------------|------------------------|----------------------------|--------|----------------------|-----------------------------------------|---------|------------------|----------------|
| 21   | 91.3           | 21               | 100%            | 52573         | 57374              | 60                            | 634.86                     | 2                | VEGVNKDPGXXX          | T0018_R_0.0657_L_2_450 | 634.86                     | 2      | VEGVNKDPGXXX         | L-amino acid oxidase                    | 7.0E-04 | BAN82140.1       | LAAO           |
|      |                |                  |                 |               |                    |                               | 502.27                     | 2                | VTVXEASER             |                        | 502.28                     | 2      | VTVXEASER            | L-amino acid oxidase                    | 5.0E-02 | Q6WFP39.1        |                |
|      |                |                  |                 |               |                    |                               | 701.68                     | 3                | NVEEGWYANXGPM*RXPEK   |                        | -                          | -      | -                    | -                                       | -       | -                |                |
|      |                |                  |                 |               |                    |                               | 755.74                     | 3                | HVVVVGAGM*SGXSAAYVXAG |                        | -                          | -      | -                    | -                                       | -       | -                |                |
|      |                |                  |                 |               |                    |                               | 676.86                     | 2                | AGHK                  |                        | -                          | -      | -                    | -                                       | -       | -                |                |
|      |                |                  |                 |               |                    |                               | 637.8                      | 2                | SAGQXYEESKKK          |                        | -                          | -      | -                    | -                                       | -       | -                |                |
|      |                |                  |                 |               |                    |                               |                            |                  | TFCYPSMXQK            |                        | -                          | -      | -                    | -                                       | -       | -                |                |
|      |                |                  |                 |               |                    |                               |                            |                  | YNSDXTVXR             |                        | 540.79                     | 2      | YNSDXTVXR            | snake venom metalloproteinase           | 2.9E-01 | AD47687.1        |                |
|      |                |                  |                 |               |                    |                               |                            |                  | XVXVVDHSMVTK          |                        | 670.88                     | 2      | -                    | -                                       | -       | -                |                |
|      |                |                  |                 |               |                    |                               |                            |                  | VPXVGVXWDHR           |                        | 710.39                     | 2      | -                    | -                                       | -       | -                |                |
|      |                | HSVAXVEDYSPXDR   | 534.27          | 3             | -                  | -                             | -                          | -                |                       |                        |                            |        |                      |                                         |         |                  |                |
|      |                | KENDVPXPCAPEDXK  | 575.62          | 3             | -                  | -                             | -                          | -                |                       |                        |                            |        |                      |                                         |         |                  |                |
| 22   | 95.5           | 22A              | 58%             | 15611         | N.D.               | 65                            | 694.89                     | 2                | XVXVVDHSM*FTK         | T0039_R_0.0184_L_1_944 | 694.89                     | 2      | XVXVVDHSMFTK         | zinc metalloproteinase disintegrin-like | 7.0E-04 | Q91AX6.1         | svMP           |
|      |                |                  |                 |               |                    |                               | 799.42                     | 2                | XYEM*VNTXNVVFR        |                        | 799.43                     | 2      | XYEMVNTXNVVFR        | snake venom metalloproteinase group III | 1.0E-06 | AMB36352.1       |                |
|      |                |                  |                 |               |                    |                               | 747.89                     | 2                | VAXVYXEM*WTNR         |                        | 747.89                     | 2      | KXVYXEMWTNR          | snake venom metalloproteinase group III | 4.0E-04 | AMB36352.1       |                |
|      |                |                  |                 |               |                    |                               | 737.95                     | 3                | XHSWVECEGECDCQCR      |                        | -                          | -      | -                    | -                                       | -       |                  |                |
|      |                |                  |                 |               |                    |                               | 728.35                     | 3                | AXFGANAAGQDACFDWNKK   |                        | -                          | -      | -                    | -                                       | -       |                  |                |
|      |                |                  |                 |               |                    |                               | 517.21                     | 2                | GTDDFYCR              |                        | -                          | -      | -                    | -                                       | -       |                  |                |
|      |                |                  |                 |               |                    |                               | 690.84                     | 2                | XFCEIVNTCK            |                        | -                          | -      | -                    | -                                       | -       |                  |                |
|      |                |                  |                 |               |                    |                               |                            |                  | XHSWVECEGECCEQCR      |                        | 742.62                     | 3      | -                    | -                                       | -       | -                |                |
|      |                |                  |                 |               |                    |                               |                            |                  | YNSDXTVXR             |                        | 540.79                     | 2      | YNSDXTVXR            | snake venom metalloproteinase           | 2.4E+00 | CAJ01688.1       |                |
|      |                |                  |                 |               |                    |                               |                            |                  | HSVAXVEDYSPXDR        |                        | 534.27                     | 3      | STHSPPDPYGMVDXGTK    | zinc metalloproteinase disintegrin-like | 2.0E-11 | PODJE2.3         |                |
|      |                | XYEM*VNTXNVVFR   | 799.42          | 2             | XXCVKPTGNXXSCK     | snake venom metalloproteinase | 3.2E-01                    | AHB62069.1       |                       |                        |                            |        |                      |                                         |         |                  |                |
|      |                | TSADYVWXGXWNQR   | 578.29          | 2             | TSADYVWXGXWNQR     | C-type lectin-like protein 2B | 4.0E-09                    | AJO70726.1       |                       |                        |                            |        |                      |                                         |         |                  |                |
|      |                | WTDGSSVXYK       | 517.26          | 2             | TTDNQWXR           | C-type lectin snakee 7        | 2.0E-02                    | Q4PRC6.1         |                       |                        |                            |        |                      |                                         |         |                  |                |
| 23   | 96.4           | 23               |                 | 53265         | 48161, 59182.8     | 65                            | -                          | -                | -                     | -                      | 588.32                     | 2      | VPXPCANQVXX          | snake venom metalloproteinase           | 7.3E+00 | AD47650.1        | svMP           |
| 24   | 104.6          | 24A              | 80%             | 38719         | 57509              | 65                            | 710.39                     | 2                | VPXVGVXWDHR           | T0033_R_0.0599_L_2_024 | 710.39                     | 2      | VPXVGVXWDHR          | snake venom metalloproteinase           | 6.5E-02 | AD47590.1        | svMP           |
|      |                |                  |                 |               |                    |                               | 571.79                     | 2                | pQXVATSEQQR           |                        | -                          | -      | -                    | -                                       | -       |                  |                |
|      |                |                  |                 |               |                    |                               | 540.79                     | 2                | YNSDXTVXR             |                        | -                          | -      | -                    | -                                       | -       |                  |                |
|      |                |                  |                 |               |                    |                               | 851.47                     | 2                | VNXXNEMYXPXNXXR       |                        | -                          | -      | -                    | -                                       | -       |                  |                |
|      |                |                  |                 |               |                    |                               | 706.32                     | 2                | SDPDYAM*VDXGTK        |                        | 706.33                     | 2      | SDPDYAMVDXGTK        | snake venom metalloproteinase           | 7.0E-05 | AD47642.1        |                |
|      |                |                  |                 |               |                    |                               | 591.8                      | 2                | SVGXQDYCK             |                        | -                          | -      | -                    | -                                       | -       |                  |                |
|      |                |                  |                 |               |                    |                               | 816.67                     | 3                | CFNYNXQGTENFHCGMENGR  |                        | 816.67                     | 3      | CFNYNXQGTENFHCGMENGR | snake venom metalloproteinase           | 5.0E-14 | AHB62069.1       |                |
|      |                |                  |                 |               |                    |                               |                            |                  | XPSPSPVGSVCR          |                        | 671.84                     | 2      | XPSPSPVGSVCR         | snake venom serine proteinase isoform 7 | 3.0E-06 | ABG26973.1       |                |
|      |                |                  |                 |               |                    |                               |                            |                  | FYCAGYQNDWDKDXMXXX    |                        | 798.7                      | 3      | FYCAGYQNDWDKDXMXXX   | snake venom serine proteinase SP-3      | 8.0E-06 | AMB36344.1       |                |
|      |                |                  |                 |               |                    |                               |                            |                  | SPEEVDFM*XK           |                        | 597.79                     | 2      | SPEEVDFMXX           | C-type lectin-like protein 2B           | 1.1E-02 | AJO70722.1       |                |
|      |                | KTWEDAIEKFCTEQAR | 633.63          | 3             | KTWEDAIEKFCTEQAR   | C-type lectin snakee 7        | 4.0E-11                    | B4XT06.1         |                       |                        |                            |        |                      |                                         |         |                  |                |
|      |                | GGHXXSXX         | 824.5           | 1             | HXXATXEWXGK        | C-type lectin snakee A16      | 1.8E-01                    | B4XSZ1.1         |                       |                        |                            |        |                      |                                         |         |                  |                |
|      |                | ADXVWXXGR        | 521.81          | 2             | -                  | -                             | -                          | -                |                       |                        |                            |        |                      |                                         |         |                  |                |
|      |                | AWSDEPNCFAAK     | 698.3           | 2             | -                  | -                             | -                          | -                |                       |                        |                            |        |                      |                                         |         |                  |                |
|      |                | TTDNQWXR         | 595.31          | 2             | -                  | -                             | -                          | -                |                       |                        |                            |        |                      |                                         |         |                  |                |



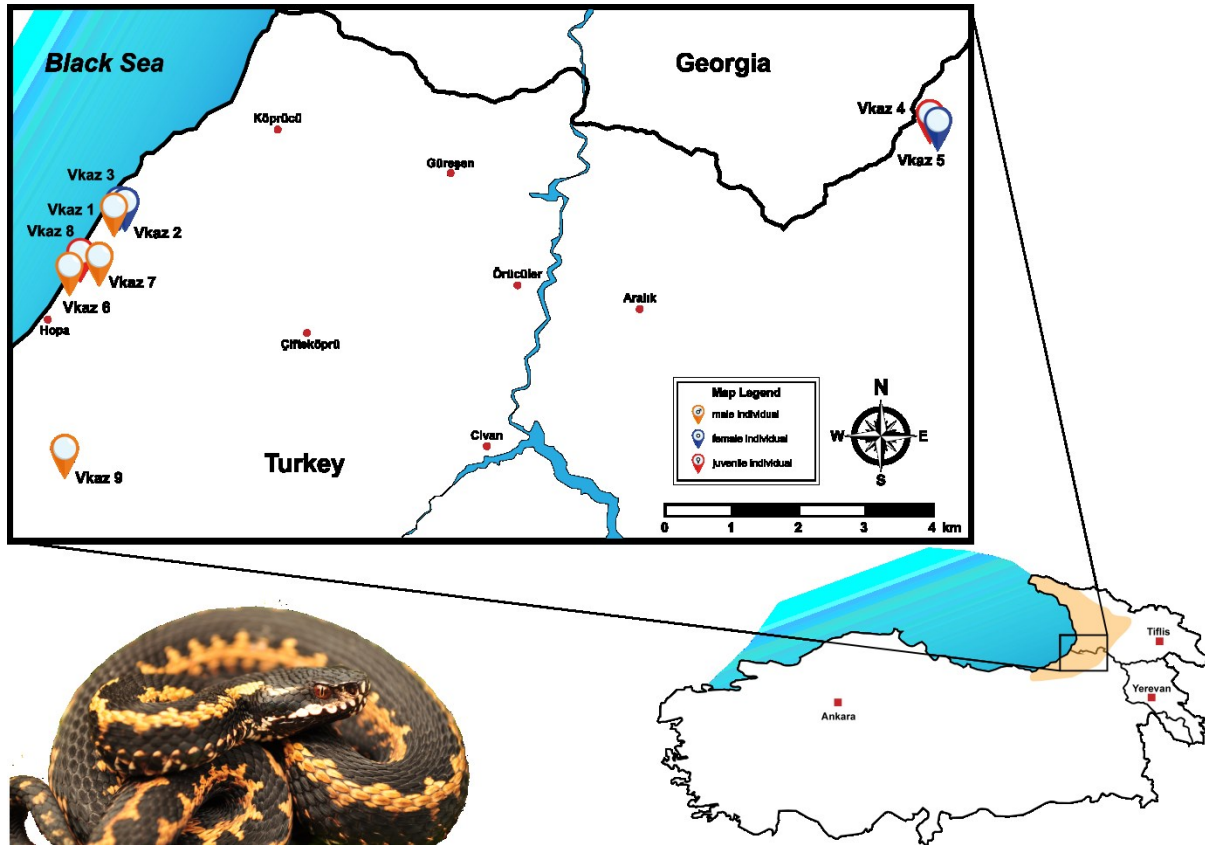

**Figure 1. Geographical distribution and sampling localities of *Vipera kaznakovi*.** The distribution area of the Caucasian Viper (*Vipera kaznakovi*, genus *Viperidae*) is highlighted on the map in the lower right corner and adapted from Geniez *et al.* [83]. The locations and sex/age of the collected individuals are marked on the map (orange – adult male, red – adult female, blue - juvenile).

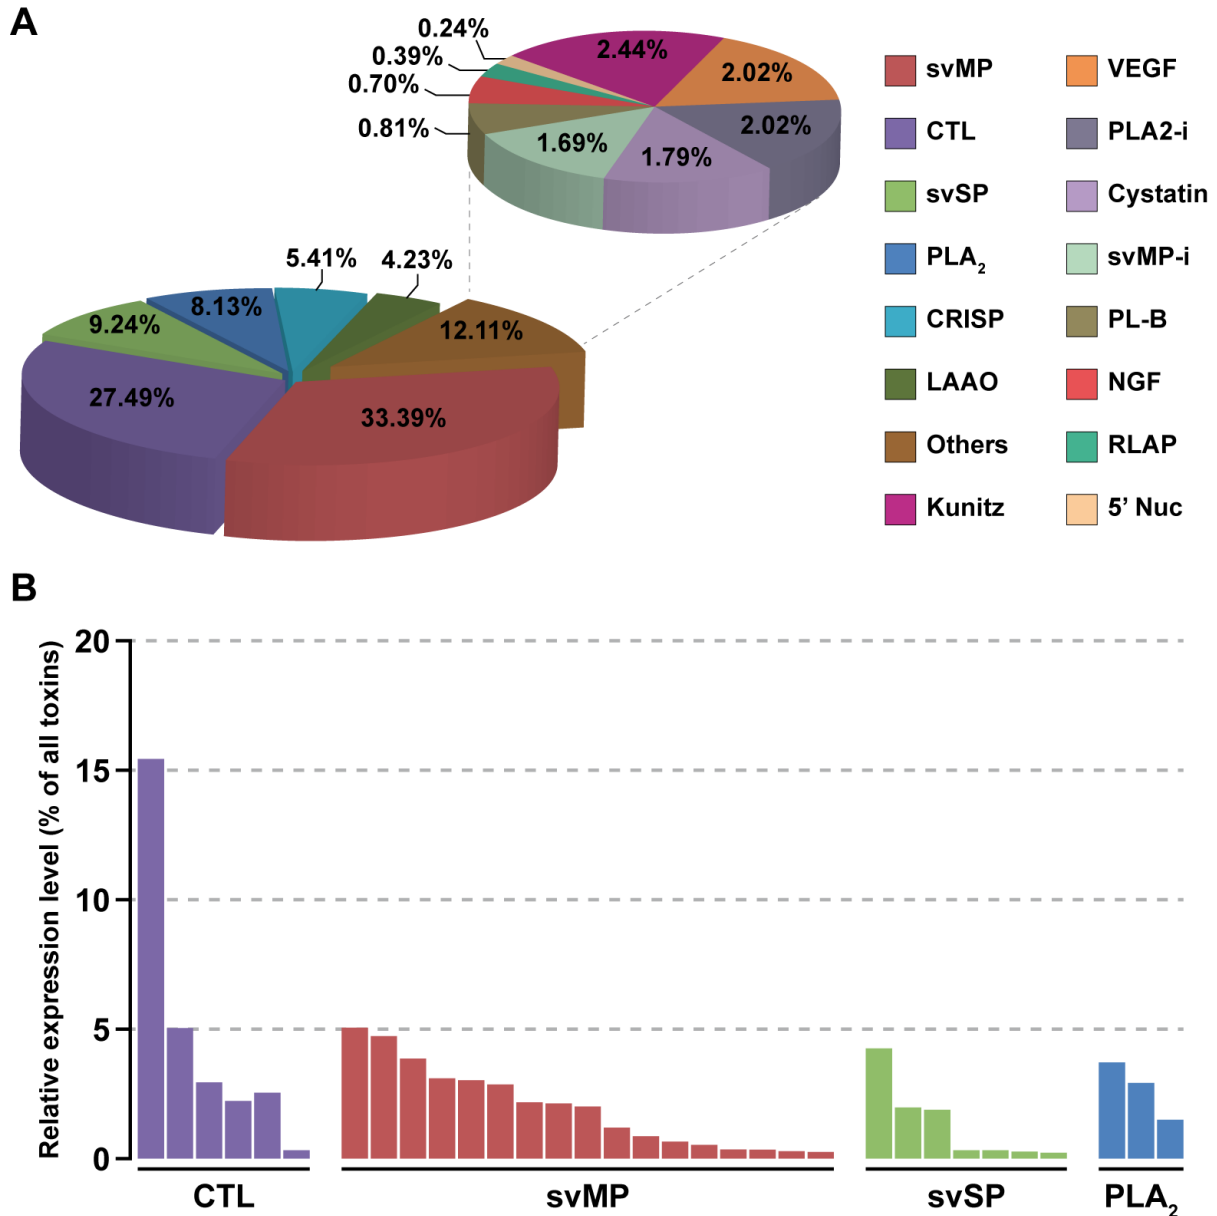

**Figure 2. The relative expression levels of toxin families identified in the *Vipera kaznakovi* venom gland transcriptome.** **A** The left pie chart shows the relative expression levels of the major toxin families, each of which accounts for greater than 4% of all toxins encoded in the venom gland. The right pie chart shows the relative expression levels of the remaining toxin families, which in combination account for 12.11% of all toxins encoded in the venom gland (“others”). Percentage values on both charts reflect the expression level of each toxin family as a percentage of the total expression of all identified toxin families. **B** The relative expression levels of individual contigs encoded by the most abundantly expressed toxin families (CTL, svMP, svSP and PLA<sub>2</sub>). Key: svMP – snake venom metalloproteinase; CTL – C-type lectin; svSP – snake venom serine protease; PLA<sub>2</sub> – phospholipase A<sub>2</sub>; CRISP – cysteine-rich secretory protein; LAAO – L-amino acid oxidase; kunitz – kunitz-type inhibitors; VEGF – vascular endothelial growth factor; PLA2-i – PLA<sub>2</sub> inhibitors, SVMP-i – SVMP inhibitors PLB – phospholipase B; NGF – nerve growth factor; RLAP – renin-like aspartic proteases; 5' Nuc – 5' nucleotidase.

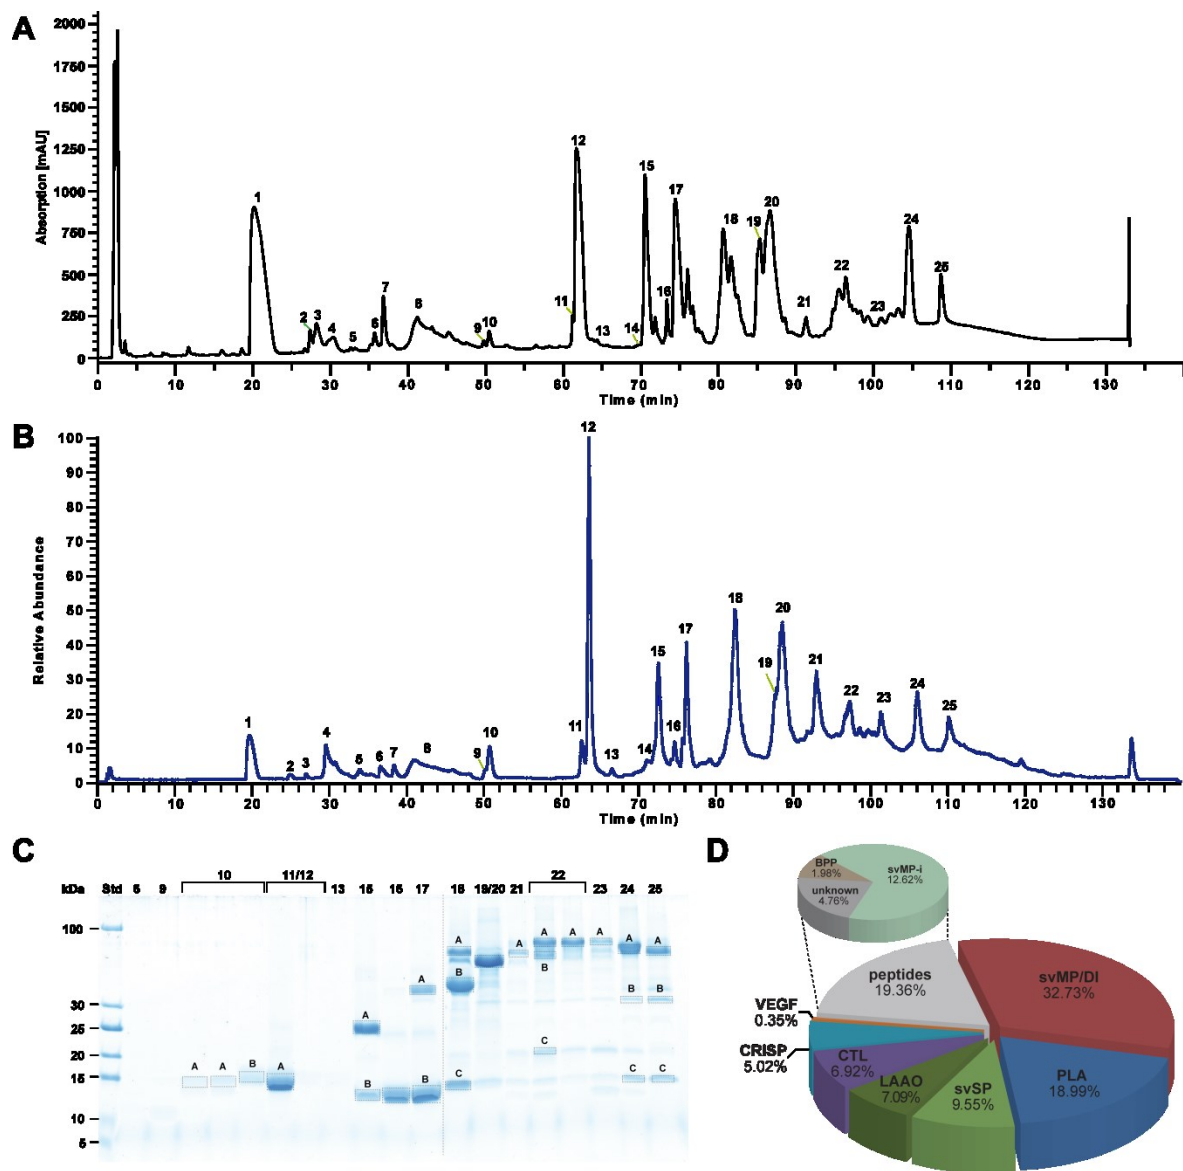

**Figure 3. Bottom-up snake venomomics of *Vipera kaznakovi*.** **A** Venom separation of *V. kaznakovi* was performed by a Supelco Discovery BIO wide Pore C18-3 RP-HPLC column and UV absorbance measured at  $\lambda = 214$  nm. **B** Total ion current (TIC) profile of crude *V. kaznakovi* venom. The peak nomenclature is based on the chromatogram fractions. **C** The RP-HPLC fractions (indicated above the lane) of the *V. kaznakovi* venom was analysed by SDS-PAGE under reducing conditions (Coomassie staining). Alphabetically marked bands per line were excised for subsequent tryptic in-gel digestion. **D** The relative occurrence of different toxin families of *V. kaznakovi* is represented by the pie chart. Identification of snake venom metalloproteinase (svMP, red), phospholipases A<sub>2</sub> (PLA<sub>2</sub>, blue), snake venom serine proteinase (svSP, green), C-type lectin like proteins (CTL, purple), cysteine rich secretory proteins (CRISP, light blue), bradykinin-potentiating peptides (BPP, light brown), vascular endothelial growth factors (VEGF-F, red), unknown proteins (n/a, black) and peptides (grey). The *de novo* identified peptides are listed in supplemental table 1.

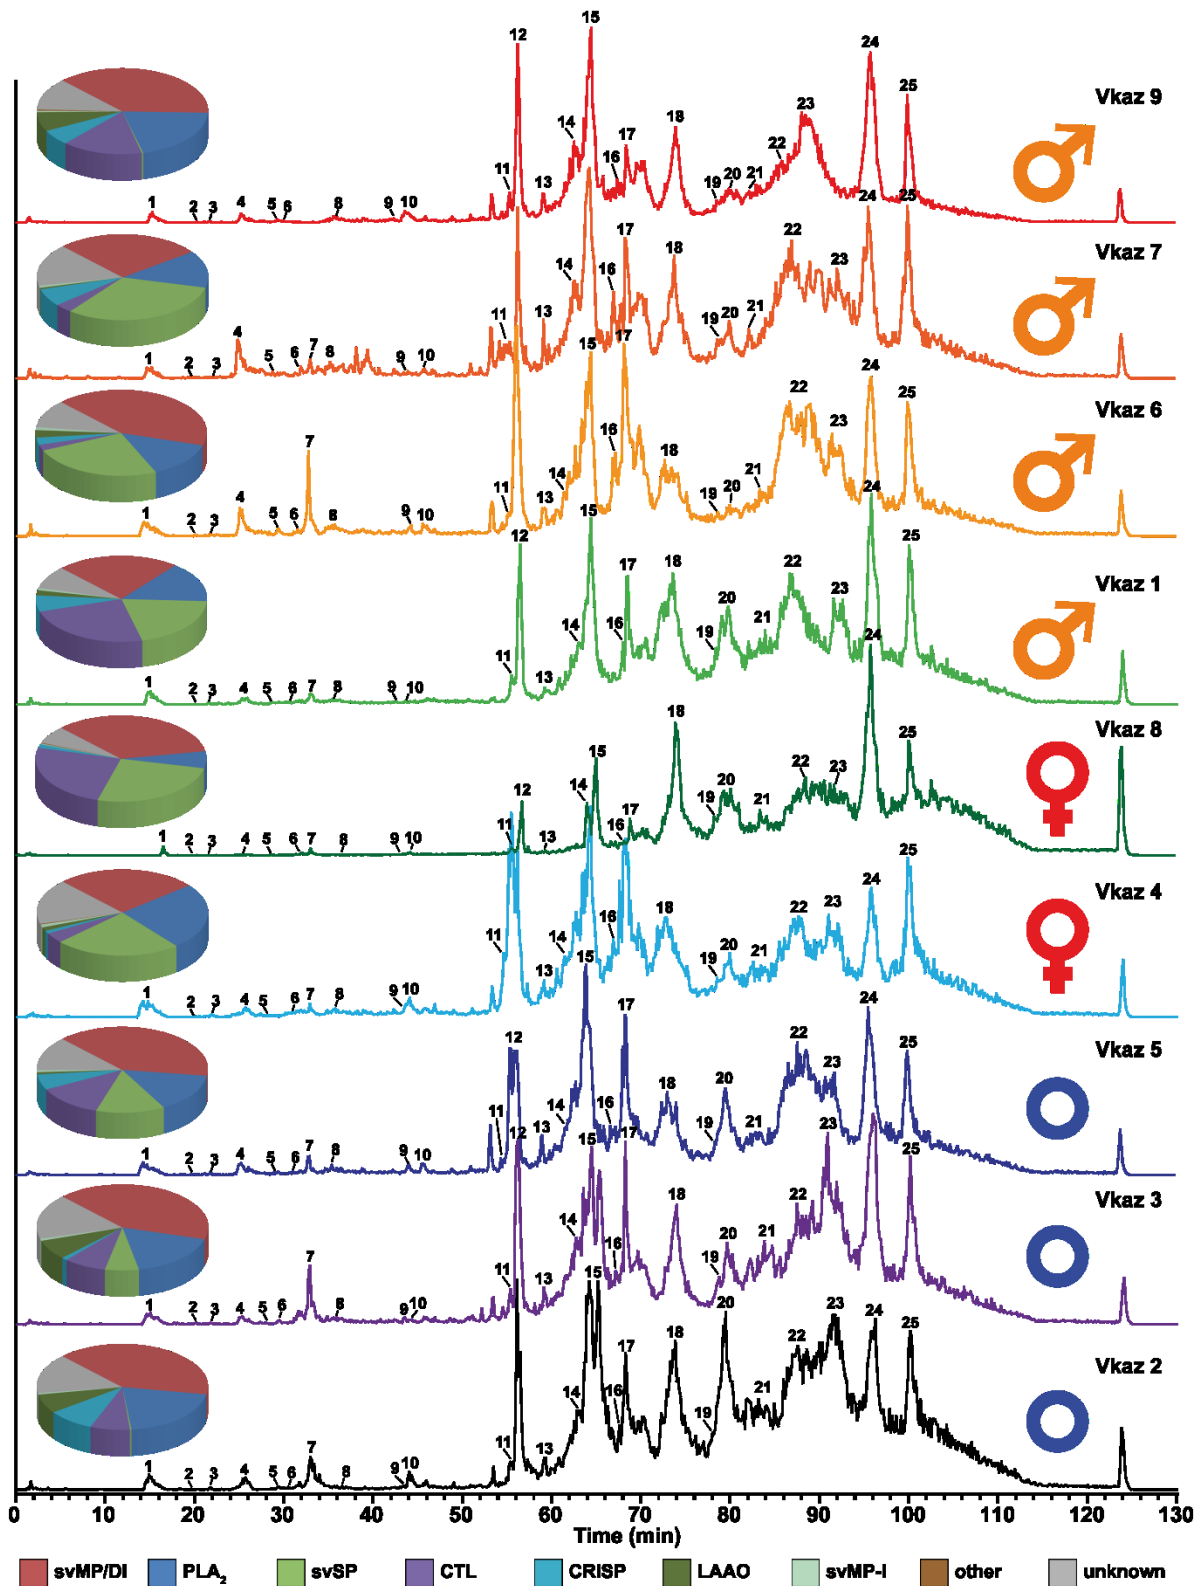

Figure 4. Intact molecular mass profiles of venom from several individuals of *V. kaznakovi*. The total ion counts (TIC) of native, crude venoms from several *V. kaznakovi* individuals were measured by HPLC-ESI-MS. The relative abundance was set to 100% for the highest peak. The peak nomenclature is based on the chromatogram fractions and is shown in figure 3A. The identified molecular masses of intact proteins and peptides are listed in supplemental table 2. The intact molecular mass profiling includes three juveniles of unknown sex (blue circle), and two female (red Venus symbol) and four male (orange Mars symbol) adult individuals.



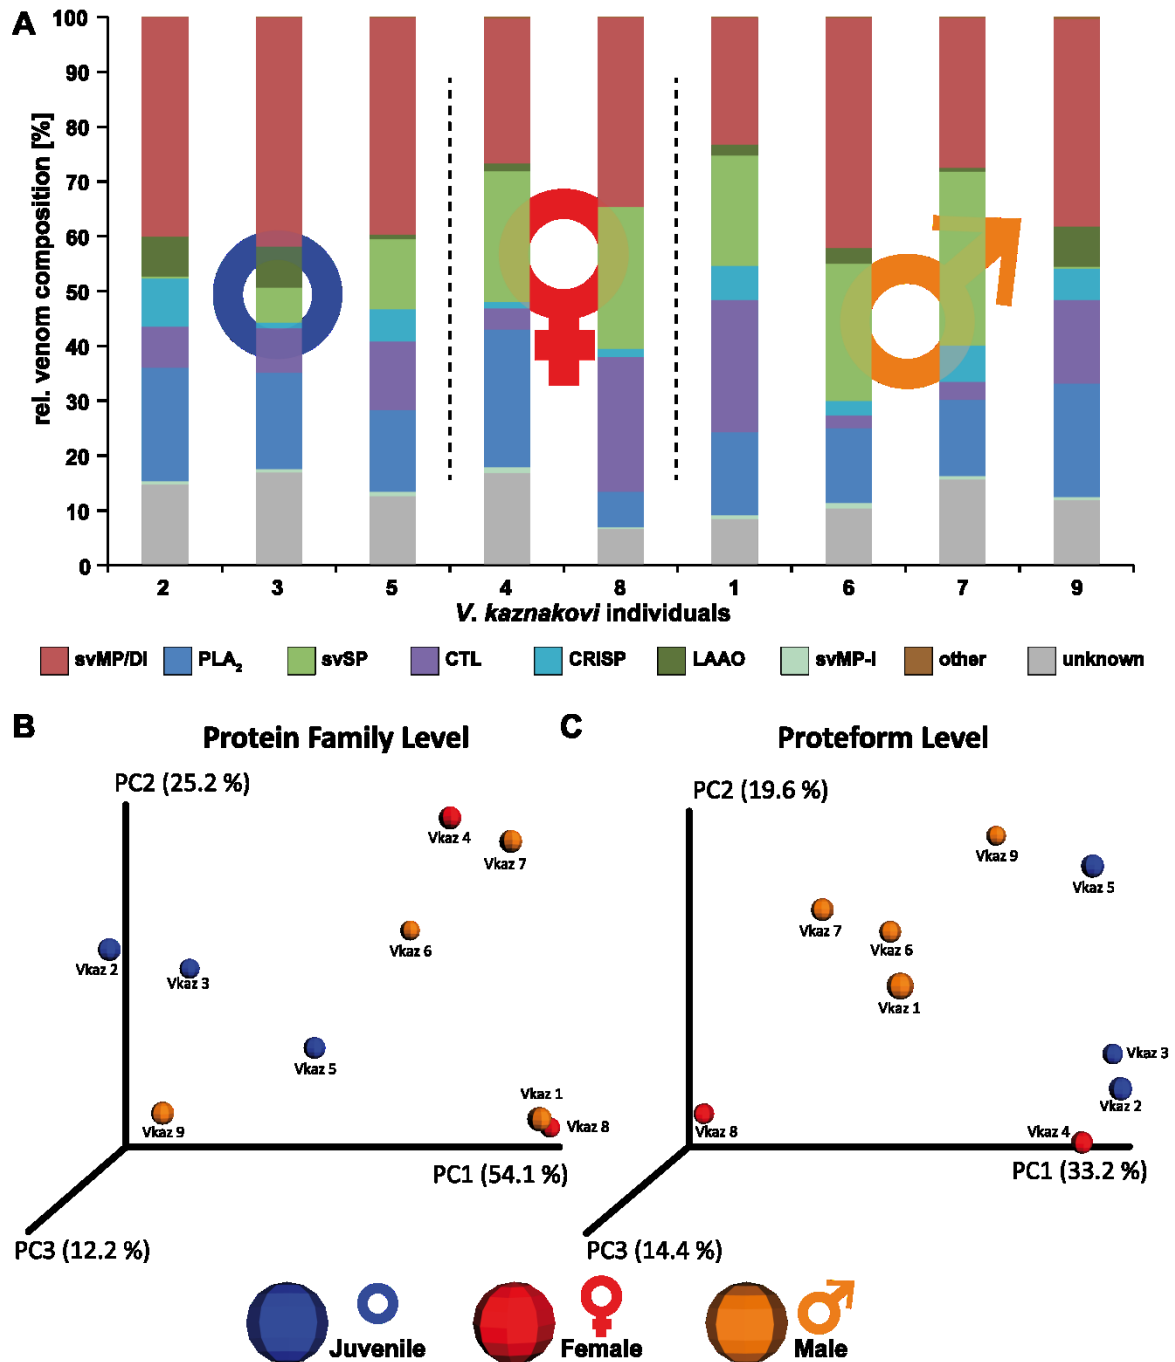

**Figure 5. Principal Component Analysis (PCoA) and relative venom composition of individual *V. kaznakovi*.** A The proteome overview includes three juveniles of unknown sex (blue circle), and two female (red Venus symbol) and four male (orange Mars symbol) adult individuals. The compositional similarity of venom is displayed through Bray-Curtis-Faith distance in PCoA space. Toxin similarity is visualized at the protein family level (B) and proteoform level (C).

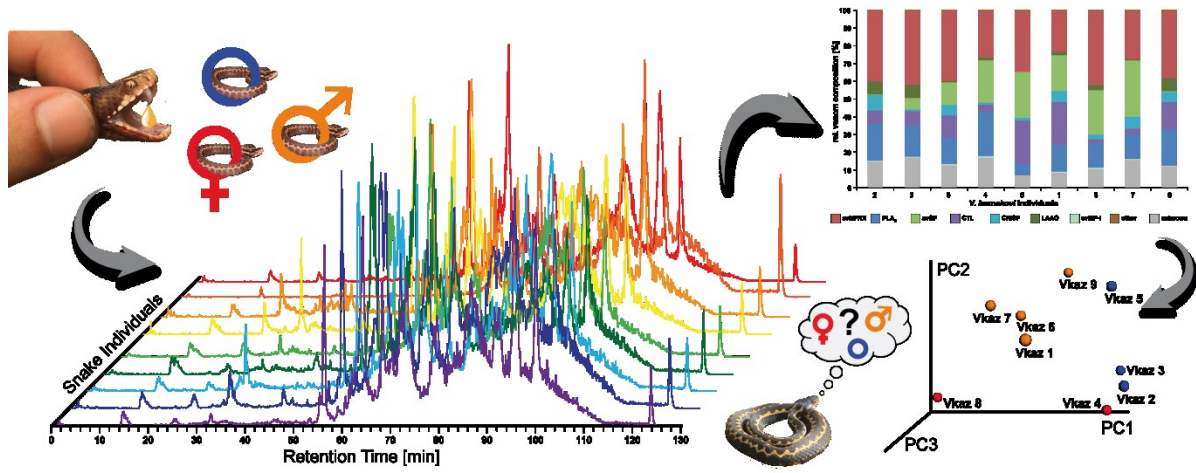

Graphical Abstract
